# Supplementary material
Source: publisher figshare collection journal article supplement (https://acs.figshare.com/ndownloader/files/4567768)

## <Supporting Information>

**Additive Pummerer Reaction of 3,5-*O*-(Di-*tert*-butyl)silylene-4-thiofuranoid**

**Glycal : A High Yield and  $\beta$ -Selective Entry to 4'-Thioribonucleosides**

Kazuhiro Haraguchi,\* Mitsuhiro Matsui, Shin Takami, and Hiromichi Tanaka

### CONTENTS

Page S2 – S22 General Experimental Section and procedures for compounds **6-30**

Page S23-S44 Fig. 1- Fig.22:  $^1\text{H}$  NMR and  $^{13}\text{C}$  NMR spectrum of compound **6-31** in  $\text{CDCl}_3$

## General Experimental Section

Melting points are uncorrected.  $^1\text{H}$  and  $^{13}\text{C}$  NMR spectra were recorded either at 400 MHz or at 500 MHz. Chemical shifts are reported relative to  $\text{Me}_4\text{Si}$ . Mass spectra (MS) were taken in FAB mode with *m*-nitrobenzyl alcohol as a matrix. Column chromatography was carried out on silica gel. Thin-layer chromatography (TLC) was performed on silica gel. When necessary, analytical samples were purified by high performance liquid chromatography (HPLC). THF was distilled from benzophenone ketyl.

### **1,4-Anhydro-2-deoxy-3,5-*O*-(di-*t*-butylsilylene)-4-thio-D-*erythro*-pento-1-enitol 1-oxide (6)**

To a  $\text{CH}_2\text{Cl}_2$  (12 mL) solution of **3** (1.04 g, 3.82 mmol) was added  $\text{CH}_2\text{Cl}_2$  (12 mL) solution of *m*-CPBA (1.05 g, 6.11 mmol) at 0 °C and the mixture was stirred for 1 h. The reaction mixture was neutralized with  $\text{Et}_3\text{N}$  and partitioned between  $\text{CHCl}_3$ /saturated aq  $\text{NaHCO}_3$ . Silica gel column chromatography (hexane/ $\text{AcOEt}$  = 2/1) of the organic layer gave a mixture of (*S<sub>R</sub>*)-**6** (major isomer) and (*S<sub>S</sub>*)-**6** (minor isomer) (926.9 mg, 84%). (*S<sub>R</sub>*)-**6** ( $t_{\text{R}}$  14 min) and (*S<sub>S</sub>*)-**6** ( $t_{\text{R}}$  18 min) were separated by HPLC (hexane/ $\text{AcOEt}$  = 1/4).

Physical data for (*S<sub>R</sub>*)-**6**: m.p. 163-164 °C. UV(MeOH) $\lambda_{\text{max}}$  249 nm ( $\epsilon$  830).  $^1\text{H}$  NMR ( $\text{CDCl}_3$ ) $\delta$  1.01 and 1.08 (18H, each as s, *t*-Bu), 2.77 (1H, ddd,  $J$  = 7.4,  $J$  = 10.4,  $J$  = 5.6

Hz), 4.52 (1H, t,  $J = J = 10.4$  Hz), 4.61 (1H, dd,  $J = 5.6$  and  $J = 10.4$  Hz), 5.92 (1H, dt,  $J = J = 1.6$  and  $J = 8.0$  Hz), 6.79 (1H, dd,  $J = 2.0$  and  $J = 6.0$  Hz), 7.06 (1H, dd,  $J = 6.0$  and  $J = 1.6$  Hz);  $^{13}\text{C}$  NMR ( $\text{CDCl}_3$ )  $\delta$  19.97, 22.66, 26.93, 27.20, 63.93, 74.93, 78.38, 136.72, 140.11. FAB-MS ( $m/z$ ) 289 ( $\text{M}^+ + \text{H}$ ). *Anal.* Calcd for  $\text{C}_{13}\text{H}_{24}\text{O}_3\text{SSi}$ : C, 54.13; H, 8.39. Found: C, 54.26; H, 8.59.

Physical data for (*S*)-**6**: m.p. 156-159 °C.  $^1\text{H}$  NMR ( $\text{CDCl}_3$ )  $\delta$  1.03 and 1.05 (9H, each as s, Si-*t*-Bu), 3.67 (1H, ddd,  $J = 5.2$ ,  $J = 12.4$  and  $J = 8.4$  Hz), 4.51 (1H, dd,  $J = 12.4$  and  $J = 10.4$  Hz), 4.76-4.81 (2H, m, H-3 and 5b), 6.64 (1H, dd,  $J = 6.4$  and  $J = 2.0$  Hz), 6.71 (1H, dd,  $J = 6.4$  and  $J = 0.8$  Hz);  $^{13}\text{C}$  NMR ( $\text{CDCl}_3$ )  $\delta$  20.19, 22.46, 26.94, 27.17, 62.59, 64.17, 80.68, 133.79, 148.35. FAB-MS ( $m/z$ ) 289 ( $\text{M}^+ + \text{H}$ ). *Anal.* Calcd for  $\text{C}_{13}\text{H}_{24}\text{O}_3\text{SSi}$ : C, 54.13; H, 8.39. Found: C, 54.46; H, 8.58.

**Additive Pummerer reaction of 6 with  $\text{Ac}_2\text{O}/\text{TMSOTf}$ : Formation of 1,2-di-*O*-acetyl-3,5-*O*-(di-*t*-butylsilylene)- $\beta,\alpha$ -4-thioribofuranose (7) and 1-*O*-Acetyl-3,5-*O*-(di-*t*-butylsilylene)-2-*O*-(trifluoromethanesulfonyl)- $\beta,\alpha$ -4-thioribofuranose (8)**

To a  $\text{CH}_2\text{Cl}_2$  (2.5 mL) solution of **6** (43.3 mg, 0.15 mmol) was added  $\text{Ac}_2\text{O}$  (22  $\mu\text{L}$ , 0.23 mmol) and TMSOTf (15  $\mu\text{L}$ , 0.08 mmol) at 0 °C under Ar atmosphere and the mixture was stirred for 7 h. The reaction mixture was partitioned between  $\text{CHCl}_3$ /saturated aq  $\text{NaHCO}_3$  and column chromatography (hexane/ $\text{AcOEt}$  = 50/1) of the organic layer gave **7** (11.6 mg, 20%, syrup,  $\beta$ -isomer/ $\alpha$ -isomer = 12:1) and **8** (15.9 mg, 22%, syrup,  $\beta$ -isomer/ $\alpha$ -isomer = 7:1).

Physical data for **7** ( $\beta$ -anomer): m.p. 105-107 °C.  $^1\text{H}$  NMR ( $\text{CDCl}_3$ )  $\delta$  1.00 and 1.07 (18H, each as s, Si-*t*-Bu), 2.10 and 2.13 (6H, each as s, Ac), 3.66-3.73 (2H, m), 4.02 (1H, t,  $J = J = 11.2$  Hz), 4.28-4.35 (2H, m), 5.47 (1H, d,  $J = 3.2$  Hz), 5.70 (1H, s); NOE experiment: H-1/H-4 (1.7%) and H-2/H-3 (7.3%);  $^{13}\text{C}$  NMR ( $\text{CDCl}_3$ )  $\delta$  20.79, 20.86, 22.67, 26.91, 27.18, 44.61, 68.43, 78.55, 79.06, 169.30, 169.48. FAB-MS ( $m/z$ ) 391 ( $\text{M}^+ + \text{H}$ ) and 331 ( $\text{M}^+ - \text{OAc}$ ). *Anal.* Calcd for  $\text{C}_{17}\text{H}_{30}\text{O}_6\text{SSi}$ : C, 52.28; H, 7.74. Found: C, 52.42; H, 7.89.

Physical data for **7** ( $\alpha$ -anomer):  $^1\text{H}$  NMR ( $\text{CDCl}_3$ )  $\delta$  1.01 and 1.04 (18H, each as s, Si-*t*-Bu), 2.07 and 2.19 (6H, each as s, Ac), 3.91-3.99 (2H, m), 4.17 (1H, dd,  $J = 4.6$  and  $J = 7.4$  Hz), 4.27 (1H, dd,  $J = 3.2$  and  $J = 10.8$  Hz), 6.70 (1H, t,  $J = J = 4.6$  Hz), 6.21 (1H, d,  $J = 4.6$  Hz); NOE experiment: H-1/H-2 (12%) and H-1/H-3 (4.8%);  $^{13}\text{C}$  NMR ( $\text{CDCl}_3$ )  $\delta$  20.12, 20.67, 22.74, 26.88, 27.16, 45.94, 72.73, 75.28, 78.69, 169.76, 169.88. FAB-MS ( $m/z$ ) 391 ( $\text{M}^+ + \text{H}$ ) and 331 ( $\text{M}^+ - \text{OAc}$ ). *Anal.* Calcd for  $\text{C}_{17}\text{H}_{30}\text{O}_6\text{SSi}$ : C, 52.28; H, 7.74. Found: C, 52.56; H, 7.87.

Physical data for **8**:  $^1\text{H}$  NMR ( $\text{CDCl}_3$ ) ( $\beta$ -isomer)  $\delta$  1.02 and 1.09 (18H, each as s, Si-*t*-Bu), 2.11 (3H, s), 3.62-3.69 (1H, m), 4.04 (1H, t,  $J_{4,5a} = J_{5a,5b} = 10.6$  Hz), 4.34 (1H, dd,  $J = 4.4$  and  $J = 10.6$  Hz), 4.40 (1H, dd,  $J = 3.4$  and  $J = 10.2$  Hz), 5.31 (1H, d,  $J = 3.4$  Hz), 5.89 (1H, s); ( $\alpha$ -isomer, selected data)  $\delta$  1.01 and 1.05 (18H, each as s, Si-*t*-Bu), 2.16 (3H, s), 3.21-3.27 (1H, m), 4.04 4.27 (1H, dd,  $J = 4.8$  and  $J = 10.0$  Hz), 4.95 (1H, dd,  $J_2 = 10.3$  and  $J = 5.3$  Hz), 4.95 (1H, dd,  $J = 10.3$  and  $J = 5.3$  Hz), 6.02 (1H,  $J = 5.3$  Hz);

$^{13}\text{C}$  NMR ( $\text{CDCl}_3$ )  $\delta$  ( $\beta$ -anomer) 20.1, 20.8, 22.8, 26.7, 27.3, 44.0, 68.5, 76.7, 78.1, 78.5, 88.7, 168.8; ( $\alpha$ -anomer, selected data) 19.9, 20.9, 22.7, 26.8, 27.2, 40.3, 68.9, 71.8, 77.2, 86.0. FAB-MS ( $m/z$ ) 481 ( $\text{M}^+\text{+H}$ ), 421 ( $\text{M}^+\text{-OAc}$ ). High resolution FAB-MS ( $m/z$ ) calcd for  $\text{C}_{16}\text{H}_{27}\text{F}_3\text{O}_7\text{S}_2\text{Si}$ : 481.0998. Found: 481.0962.

#### **Additive Pummerer reaction of **6** with $\text{Ac}_2\text{O}/\text{SnCl}_4$ : Formation of **9****

To a  $\text{CH}_2\text{Cl}_2$  (2.5 mL) solution of **6** (43.3 mg, 0.15 mmol) was added  $\text{Ac}_2\text{O}$  (44  $\mu\text{L}$ , 0.46 mmol) and  $\text{SnCl}_4$  (1.0 M  $\text{CH}_2\text{Cl}_2$  solution) (0.31 mL, 0.31 mmol) at 0  $^\circ\text{C}$  under Ar atmosphere and the mixture was stirred overnight. The reaction mixture was partitioned between  $\text{CHCl}_3$ /saturated aq  $\text{NaHCO}_3$  and column chromatography (hexane/ $\text{AcOEt}$  = 60/1) of the organic layer gave **9** (36.3 mg, 52%, syrup,  $\beta$ -isomer/ $\alpha$ -isomer = 5:1):  $^1\text{H}$  NMR ( $\text{CDCl}_3$ ) ( $\beta$ -isomer)  $\delta$  1.09 and 1.10 (18H, each as s, Si-*t*-Bu), 2.07, 2.11 and 2.16 (9H, each as s), 3.69-3.73 (1H, m), 4.12 (1H, dd,  $J = 7.3$  and  $J = 11.4$  Hz), 4.47 (1H, dd,  $J = 5.4$  and  $J = 11.4$  Hz), 4.53 (1H, dd,  $J = J = 3.4$  Hz), 4.90 (1H, dd,  $J = 3.4$  and  $J = 6.6$  Hz), 5.93 (1H, d,  $J = 3.4$  Hz). ( $\alpha$ -isomer, selected data)  $\delta$  1.11 and 1.14 (18H, each as s, Si-*t*-Bu), 3.83-3.87 (1H, m), 4.07 (1H, dd,  $J = 7.3$  and  $J = 11.4$  Hz), 4.41 (1H, dd,  $J = 5.1$  and  $J = 3.5$  Hz), 4.96 (1H, dd,  $J = 3.5$  and  $J = 1.5$  Hz), 6.19 (1H, d,  $J = 5.1$  Hz);  $^{13}\text{C}$  NMR ( $\text{CDCl}_3$ )  $\delta$  ( $\beta$ -anomer) 20.70, 20.80, 21.06, 21.33, 22.56, 27.24, 27.34, 48.97, 64.98, 65.24, 76.43, 82.31, 169.54, 169.92, 170.50; ( $\alpha$ -anomer) 20.74, 20.93, 21.66, 22.63, 27.63, 27.20, 27.46, 29.65, 51.60, 61.32, 78.45, 78.61, 170.11, 170.31, 170.43. FAB-MS ( $m/z$ ) 469 and 471 ( $\text{M}^+\text{+H}$ ). *Anal.* Calcd for  $\text{C}_{19}\text{H}_{33}\text{ClO}_7\text{SSi}$ : C, 48.86; H, 7.17.

Found: C, 49.20; H, 7.22.

**Additive Pummerer reaction of **6** with Ac<sub>2</sub>O/TMSOAc/BF<sub>3</sub> OEt<sub>2</sub>: Formation of **7**, **10** and **11****

To a CH<sub>2</sub>Cl<sub>2</sub> (25 mL) solution of **6** (1.15 g, 3.99 mmol) was added Ac<sub>2</sub>O (2.6 mL, 27.93 mmol), TMSOAc (4.2 mL, 27.93 mmol) and BF<sub>3</sub> • OEt<sub>2</sub> (3.5 mL, 27.93 mmol) at 0 °C under Ar atmosphere and the mixture was stirred overnight. The reaction mixture was partitioned between CHCl<sub>3</sub>/saturated aq NaHCO<sub>3</sub> and column chromatography (hexane/AcOEt = 40/1-20/1) of the organic layer gave **7** (967.2 mg, 62%, solid, β-isomer/α-isomer = 13:1), **10** (54.3 mg, 3%, syrup, β-isomer/α-isomer = 13:1) and **11** (334.9 mg, 17%, syrup, β-isomer/α-isomer = 4.9:1).

Physical data for **10**: <sup>1</sup>H NMR (CDCl<sub>3</sub>) (β-isomer) δ 1.05 and 1.06 (18H, each as s, Si-*t*-Bu), 2.07, 2.09 and 2.13 (9H, each as s), 3.64-3.69 (1H, m), 4.18 (1H, dd, *J* = 7.2 and *J* = 11.6 Hz), 4.43 (1H, dd, *J* = 5.6 and *J* = 11.4 Hz), 4.59 (1H, dd, *J* = 5.6 and *J* = 8.8 Hz), 5.41 (1H, dd, *J* = 3.2 and *J* = 3.6 Hz), 5.81 (1H, d, *J* = 3.2 Hz); (α-isomer, selected data) δ 3.40-3.45 (1H, m), 4.52 (1H, dd, *J*<sub>4,5b</sub> = 4.6 and *J* = 11.4 Hz), 5.21 (1H, dd, *J* = 4.4 and *J* = 9.2 Hz), 5.94 (1H, d, *J* = 4.4 Hz); <sup>13</sup>C NMR (CDCl<sub>3</sub>) δ (β-anomer) 20.14, 20.69, 20.91, 26.73, 26.79, 21.19, 29.70, 49.08, 64.91, 74.48, 77.88, 79.21, 169.66, 169.92, 170.44; δ (α-isomer, selected data) 26.81, 45.75, 65.46, 74.23, 76.11, 78.17, 170.42. FAB-MS (*m/z*) 393 (M<sup>+</sup>-OAc). *Anal.* Calcd for C<sub>19</sub>H<sub>33</sub>FO<sub>7</sub>SSi • 1/3AcOEt: C, 50.67; H, 7.46. Found: C, 51.02; H, 7.37.

Physical data for **11**:  $^1\text{H}$  NMR ( $\text{CDCl}_3$ ) ( $\beta$ -isomer)  $\delta$  1.07 and 1.08 (18H, s, Si-*t*-Bu), 2.10, 2.13 and 2.15 (12H, each as s), 3.68-3.73 (1H, m), 4.12 (1H, dd,  $J$  = 7.6 and  $J$  = 11.6 Hz), 4.51 (1H, dd,  $J$  = 4.4 and  $J$  = 11.6 Hz), 4.79 (1H, dd,  $J$  = 3.6 and  $J$  = 7.2 Hz), 5.50 (1H, dd,  $J$  = 2.8 and  $J$  = 3.6 Hz), 5.77 (1H, d,  $J$  = 2.8 Hz); ( $\alpha$ -isomer)  $\delta$  1.09 and 1.11 (18H, each as s), 2.06, 2.08, 2.10 and 2.14 (12H, each as s), 3.79 (1H, dt,  $J$  = 2.0,  $J$  = 4.8 and  $J$  = 6.8 Hz), 4.10 (1H, dd,  $J$  = 4.8 and  $J$  = 10.8 Hz), 4.15 (1H, dd,  $J$  = 6.8 and  $J$  = 10.8 Hz), 4.90 (1H, dd,  $J$  = 4.4 and  $J$  = 2.0 Hz), 5.28 (1H, dd,  $J$  = 5.6 and  $J$  = 4.4 Hz), 6.24 (1H, d,  $J$  = 5.6 Hz);  $^{13}\text{C}$  NMR ( $\text{CDCl}_3$ )  $\delta$  ( $\beta$ -anomer) 20.30, 20.49, 20.54, 20.65, 22.11, 26.81, 26.88, 48.57, 64.85, 72.35, 74.69, 77.29, 78.73, 169.30, 169.44, 169.47, 169.97;  $\delta$  ( $\alpha$ -anomer) 20.56, 20.64, 20.93, 21.31, 22.45, 27.03, 27.11, 27.17, 50.03, 64.87, 74.47, 76.19, 76.32, 169.61, 169.68, 170.09, 170.33. FAB-MS ( $m/z$ ) 433 ( $\text{M}^+ - \text{OAc}$ ). *Anal.* Calcd for  $\text{C}_{21}\text{H}_{36}\text{O}_9\text{SSi}$ : C, 51.20; H, 7.37. Found: C, 51.41; H, 7.56.

**1-[2-*O*-Acetyl-3,5-*O*-(di-*t*-butylsilylene)-4-thio- $\beta,\alpha$ -D-ribofuranosyl]uracil (**12**)**

To an  $\text{CH}_3\text{CN}$  (3.5 mL) solution of bis-*O*-trimethylsilyluracil, prepared from uracil (90.8 mg, 0.81 mmol) and BSA (0.4 mL, 1.62 mmol, ), was added an  $\text{CH}_2\text{Cl}_2$  (3.5 mL) solution of **7** (104.1 mg, 0.27 mmol) and TMSOTf (0.21 mL, 1.08 mmol) at 0 °C under Ar atmosphere and the mixture was stirred at 60 °C for 24 h. The reaction mixture was partitioned between  $\text{CHCl}_3$ /saturated aq  $\text{NaHCO}_3$  and column chromatography (hexane/AcOEt = 3/1) of the organic layer gave **12** (111.7 mg, 93%, **12 $\beta$** /**12 $\alpha$**  = 22:1) as a foam: UV (MeOH) $\lambda_{\text{max}}$  264 nm ( $\epsilon$  10500),  $\lambda_{\text{min}}$  232 nm ( $\epsilon$  2400);  $^1\text{H}$  NMR ( $\text{CDCl}_3$ )

(**12 $\beta$** ) $\delta$  1.00 and 1.05 (18H, each as s), 2.15 (3H, s), 3.70-3.76 (1H, m), 4.12 (1H, dd,  $J$  = 10.4 and  $J$  = 11.2 Hz), 4.27 (1H, dd,  $J$  = 4.4 and  $J$  = 10.0 Hz), 4.41 (1H, dd,  $J$  = 4.4 and  $J$  = 11.2 Hz), 5.50 (1H, dd,  $J$  = 0.8 and  $J$  = 4.4 Hz), 5.83 (1H, d,  $J$  = 8.2 Hz), 5.96 (1H, d,  $J$  = 0.8 Hz), 7.61 (1H, d,  $J$  = 8.2 Hz), 9.18 (1H, br); (**12 $\alpha$** , selected data) $\delta$  1.01 and 1.07 (18H, each as s), 2.12 (3H, s), 5.21 (1H, dd,  $J$  = 7.2 and  $J$  = 9.5 Hz), 5.89 (1H, d,  $J$  = 8.2 Hz), 6.11 (1H, d,  $J$  = 7.2 Hz), 7.86 (1H, d,  $J$  = 8.2 Hz); NOE experiment ( $\beta$ -isomer): H-1'/H-4' (1.2%), H-6/H-2' (2.5%), H-6/H-5'a (6.2%), COCH<sub>3</sub>/H-4' (0.6%); <sup>13</sup>C NMR (CDCl<sub>3</sub>)  $\delta$  (**12 $\beta$** ) 20.06, 20.82, 22.84, 26.84, 27.17, 27.32, 46.34, 63.61, 67.80, 79.38, 103.36, 140.30, 149.74, 162.00, 168.86. FAB-MS ( $m/z$ ) 443 ( $M^+$ +H). *Anal.* Calcd for C<sub>19</sub>H<sub>30</sub>N<sub>2</sub>O<sub>6</sub>SSi 1/4AcOEt: C, 51.70; H, 6.94; N, 6.02. Found: C, 51.98; H, 7.07; N, 5.83.

### **1-[2-*O*-Acetyl-3,5-*O*-(di-*t*-butylsilylene)-4-thio- $\beta,\alpha$ -D-ribofuranosyl]thymine (**13**)**

To an CH<sub>3</sub>CN (3.5 mL) solution of bis-*O*-trimethylsilylthymine, prepared from thymine (102.1 mg, 0.81 mmol) and BSA (0.4 mL, 1.62 mmol), was added an CH<sub>2</sub>Cl<sub>2</sub> (3.5 mL) solution of **7** (106.6 mg, 0.27 mmol) and TMSOTf (0.21 mL, 1.08 mmol) at 0 °C under Ar atmosphere and the mixture was stirred at 80 °C for 19 h. The reaction mixture was partitioned between CHCl<sub>3</sub>/sat. NaHCO<sub>3</sub> and silica gel column chromatography (hexane/AcOEt = 3/1) of the organic layer gave **13** (114.8 mg, 93%, **13 $\beta$** /**13 $\alpha$**  = 22:1) as a foam: UV (MeOH) $\lambda_{\max}$  269 nm ( $\epsilon$  9700),  $\lambda_{\min}$  236 nm ( $\epsilon$  2400); <sup>1</sup>H NMR (CDCl<sub>3</sub>) (**13 $\beta$** ) $\delta$  1.00 and 1.07 (18H, each as s), 1.96 (3H, d,  $J$  = 1.2 Hz), 2.05 (3H, s), 3.68-3.75



(1H, m), 4.14 (1H, dd,  $J = 10.4$  and  $J = 11.2$  Hz), 4.34 (1H, dd,  $J = 4.4$  and  $J = 10.2$  Hz), 4.40 (1H, dd,  $J = 4.8$  and  $J = 11.2$  Hz), 5.50 (1H, dd,  $J = 0.8$  and  $J = 4.4$  Hz), 5.96 (1H, d,  $J = 0.8$  Hz), 7.30 (1H, d,  $J = 1.2$  Hz), 8.84 (1H, br); (**13 $\alpha$** , selected data)  $\delta$  0.99 and 1.05 (18H, each as s), 2.00 (3H, d,  $J = 1.3$  Hz), 2.13 (3H, s), 3.62-3.67 (1H, m), 4.26 (1H, dd,  $J = 4.8$  and  $J = 10.2$  Hz), 5.23 (1H, dd,  $J = 7.3$  and  $J = 9.5$  Hz), 6.12 (1H, d,  $J = 7.3$  Hz), 7.39 (1H, d,  $J = 1.3$  Hz); NOE experiment (**13 $\beta$** ): H-1'/H-4' (2.0%), H-6/H-2' (4.0%), H-6/H-3' (7.0%);  $^{13}\text{C}$  NMR ( $\text{CDCl}_3$ )  $\delta$  (**13 $\beta$** ) 12.76, 20.07, 20.84, 22.85, 26.85, 26.89, 27.17, 46.51, 63.61, 67.69, 79.48, 112.09, 136.02, 149.78, 162.69, 168.99. FAB-MS ( $m/z$ ) 457 ( $\text{M}^+ + \text{H}$ ). *Anal.* Calcd for  $\text{C}_{20}\text{H}_{32}\text{N}_2\text{O}_6\text{SSi } 1/4\text{AcOEt}$ : C, 52.70; H, 7.16; N, 5.85. Found: C, 52.64; H, 7.31; N, 5.66.

**1-[2-*O*-Acetyl-3,5-*O*-(di-*t*-butylsilylene)-4-thio- $\beta,\alpha$ -D-ribofuranosyl]-*N*-acetylcytosine (**14**)**

To an  $\text{CH}_3\text{CN}$  (3.5 mL) solution of bis-*N,O*-trimethylsilyl-*N*-acetylcytosine, prepared from *N*-acetylcytosine (128.6 mg, 0.84 mmol) and BSA (0.42 mL, 1.68 mmol, ), was added an  $\text{CH}_2\text{Cl}_2$  (3.5 mL) solution of **7** (108 mg, 0.28 mmol) and TMSOTf (0.22 mL, 1.12 mmol) at 0 °C under Ar atmosphere and the reaction mixture was stirred at 60 °C for 15 h. The reaction mixture was partitioned between  $\text{CHCl}_3/\text{sat. NaHCO}_3$  and silica gel column chromatography (hexane/AcOEt = 1/1) of the organic layer gave **14** (123.4 mg, 91%, **14 $\beta$** /**14 $\alpha$**  = 23:1) as a foam: UV (MeOH)  $\lambda_{\text{shoulder}}$  305 nm ( $\epsilon$  4400) and 279 nm ( $\epsilon$  6500),  $\lambda_{\text{max}}$  249 nm ( $\epsilon$  11900),  $\lambda_{\text{min}}$  228 nm ( $\epsilon$  6400);  $^1\text{H}$  NMR ( $\text{CDCl}_3$ ) (**14 $\beta$** )

$\delta$  0.99 and 1.04 (18H, each as s), 2.15 and 2.27 (6H, each as s), 3.73-3.79 (1H, m), 4.14 (1H, dd,  $J = 10.4$  and  $J = 11.2$  Hz), 4.24 (1H, dd,  $J = 4.0$  and  $J = 11.2$  Hz), 4.42 (1H, dd,  $J = 4.4$  and  $J = 10.2$  Hz), 5.58 (1H, d,  $J = 4.4$  Hz), 6.02 (1H, s), 7.49 (1H, d,  $J = 7.2$  Hz), 8.13 (1H, d,  $J = 7.2$  Hz), 9.81 (1H, br); (**14 $\alpha$** )  $\delta$  1.02 and 1.07 (18H, each as s), 2.09 and 2.26 (6H, each as s), 3.80-3.86 (1H, m), 4.00 (1H, t,  $J = J = 10.3$  Hz), 4.27 (1H, dd,  $J = 4.6$  and  $J = 10.3$  Hz), 5.31 (1H, d,  $J = 6.4$  and  $J = 6.3$  Hz), 6.19 (1H, d,  $J = 6.4$ ), 7.53 (1H, d,  $J = 7.7$  Hz), 8.24 (1H, d,  $J = 7.7$  Hz), 9.61 (1H, br); NOE experiment (**14 $\beta$** ): H-1'/H-4' (0.8%), H-6/H-2' (2.5%) and H-6/H-3' (5.2%);  $^{13}\text{C}$  NMR ( $\text{CDCl}_3$ )  $\delta$  (**14 $\beta$** ) 19.86, 20.83, 22.69, 24.79, 26.80, 27.10, 45.91, 64.98, 67.99, 76.94, 78.73, 97.47, 145.29, 155.02, 162.86, 168.58, 171.44. FAB-MS ( $m/z$ ) 484 ( $\text{M}^+ + \text{H}$ ). *Anal.* Calcd for  $\text{C}_{21}\text{H}_{33}\text{N}_3\text{O}_6\text{SSi}$ : C, 52.15; H, 6.88; N, 8.69. Found: C, 52.18; H, 6.98; N, 8.45.

**9-[2-*O*-Acetyl-3,5-*O*-(di-*t*-butylsilylene)-4-thio- $\beta,\alpha$ -D-ribofuranosyl]-6-chloropurine (15) and 7-[2-*O*-Acetyl-3,5-*O*-(di-*t*-butylsilylene)-4-thio- $\beta,\alpha$ -D-ribofuranosyl]-6-chloropurine (16)**

To an  $\text{CH}_3\text{CN}$  (3.5 mL) solution of *N*-trimethylsilyl-6-chloropurine, prepared from 6-chloropurine (129.8 mg, 0.84 mmol) and BSA (0.21 mL, 0.84 mmol, ), was added an  $\text{CH}_2\text{Cl}_2$  (3.5 mL) solution of **7** (108.2 mg, 0.28 mmol) and TMSOTf (0.22 mL, 1.12 mmol) at 0 °C under Ar atmosphere and the mixture was stirred at 80 °C for 8 h. The reaction mixture was partitioned between  $\text{CHCl}_3/\text{sat. NaHCO}_3$  and preparative TLC purification (hexane/AcOEt = 2/1) of the organic layer gave **15** (78.8 mg, 58%,

**15 $\beta$ /15 $\alpha$**  = 24:1, syrup) and **16** (28.4 mg, 21%, **16 $\beta$ /16 $\alpha$**  = 23:1, solid).

Physical data for **15**: UV (MeOH)  $\lambda_{\max}$  265 nm ( $\epsilon$  8800),  $\lambda_{\min}$  229 nm ( $\epsilon$  3000);  $^1\text{H}$  NMR ( $\text{CDCl}_3$ ) (**15 $\beta$** )  $\delta$  1.03 and 1.08 (18H, each as s), 2.22 (3H, s), 3.85-3.91 (1H, m), 4.25 (1H, dd,  $J = 10.4$  and  $J = 10.8$  Hz), 4.45 (1H, dd,  $J = 4.8$  and  $J = 10.8$  Hz), 4.93 (1H, dd,  $J = 4.0$  and  $J = 10.0$  Hz), 5.64 (1H, d,  $J = 4.0$  Hz), 5.98 (1H, s), 8.35 and 8.77 (2H, each as s); (**15 $\alpha$** , selected data)  $\delta$  2.27 (3H, s), 5.93 (1H, d,  $J = 4.0$  Hz), 8.33 and 8.74 (2H, each as s); NOE experiment ( $\beta$ -isomer): H-1'/H-4' (1.4%), H-8/H-3' (3.7%);  $^{13}\text{C}$  NMR ( $\text{CDCl}_3$ )  $\delta$  (**15 $\beta$** ) 20.08, 20.85, 22.86, 26.88, 27.17, 29.69, 46.10, 61.37, 67.94, 77.67, 78.86, 132.46, 143.98, 151.15, 152.20, 169.27. HMBC spectra; H-1'/C-4; FAB-MS ( $m/z$ ) 487 and 485 ( $\text{M}^+ + \text{H}$ ). *Anal.* Calcd for  $\text{C}_{20}\text{H}_{29}\text{ClN}_4\text{O}_4\text{SSi } 1/10\text{H}_2\text{O}$ : C, 49.34; H, 6.05; N, 11.51. Found: C, 49.65; H, 5.97; N, 11.14.

Physical data for **16**: m.p. 212-215  $^\circ\text{C}$ ; UV (MeOH)  $\lambda_{\max}$  273 nm ( $\epsilon$  6500),  $\lambda_{\text{shoulder}}$  256 nm ( $\epsilon$  5700),  $\lambda_{\min}$  232 nm ( $\epsilon$  3600);  $^1\text{H}$  NMR ( $\text{CDCl}_3$ ) (**16 $\beta$** )  $\delta$  1.01 and 1.03 (18H, each as s), 2.17 (3H, s), 3.83-3.90 (1H, m), 4.21 (1H, dd,  $J = J = 11.2$  Hz), 4.37 (1H, dd,  $J = 3.6$  and  $J = 11.2$  Hz), 4.50 (1H, dd,  $J = 4.4$  and  $J = 10.2$  Hz), 5.73 (1H, d,  $J = 4.4$  Hz), 6.41 (1H, s), 8.51 and 8.93 (2H, each as s); (**16 $\alpha$** , selected data)  $\delta$  5.86 (1H, dd,  $J = 4.4$  and  $J = 3.2$  Hz), 6.93 (1H, d,  $J = 4.4$  Hz), 8.89 and 8.90 (2H, each as s); NOE experiment: H-1'/H-4' (2.0%), H-8/H-2' (2.0%), H-8/H-3' (5.0%);  $^{13}\text{C}$  NMR ( $\text{CDCl}_3$ )  $\delta$  (**16 $\beta$** ) 20.02, 20.71, 22.83, 26.85, 27.11, 29.69, 45.81, 63.29, 67.99, 77.47, 78.85, 122.40, 143.04, 147.25, 153.10, 168.45.; HMBC spectra; H-1'/C-5; FAB-MS

(*m/z*) 487 and 485 ( $M^+ + H$ ). *Anal.* Calcd for  $C_{20}H_{29}ClN_4O_4SSi\ 2/3AcOEt$ : C, 50.06; H, 6.36; N, 10.30. Found: C, 50.37; H, 6.20; N, 10.63.

**9-[2-*O*-Acetyl-3,5-*O*-(di-*t*-butylsilylene)-4-thio- $\beta,\alpha$ -D-ribofuranosyl]-2-amino-6-chloropurine (17) and 7-[2-*O*-Acetyl-3,5-*O*-(di-*t*-butylsilylene)-4-thio- $\beta,\alpha$ -D-ribofuranosyl]-2-amino-6-chloropurine (18)**

To an  $CH_3CN$  (3 mL) solution of bis-*N,O*-trimethylsilyl-2-amino-6-chloropurine, prepared from 2-amino-6-chloropurine (132.3 mg, 0.78 mmol) and BSA (0.39 mL, 1.56 mmol), was added an  $ClCH_2CH_2Cl$  (3 mL) solution of **7** (101.5 mg, 0.26 mmol) and TMSOTf (0.2 mL, 1.04 mmol) at 0 °C under Ar atmosphere and the reaction mixture was stirred at 100 °C for 28 h. The reaction mixture was partitioned between  $CHCl_3$ /sat.  $NaHCO_3$  and preparative TLC purification (hexane/ $AcOEt$  = 1/1) of the organic layer gave **17** (63.3 mg, 49%, **17 $\beta$** /**17 $\alpha$**  = 23:1, syrup) and **18** (29 mg, 22%, **18 $\beta$** /**18 $\alpha$**  = 13:1, syrup).

Physical data for **17**: UV (MeOH)  $\lambda_{max}$  310 nm ( $\epsilon$  7800), 250 nm ( $\epsilon$  6500) and 224 nm ( $\epsilon$  19000),  $\lambda_{min}$  272 nm ( $\epsilon$  1400) and 241 nm ( $\epsilon$  5900);  $^1H$  NMR ( $CDCl_3$ ) (**17 $\beta$** )  $\delta$  1.02 and 1.07 (18H, each as s), 2.20 (3H, s), 3.80-3.86 (1H, m), 4.20 (1H, dd,  $J = J = 11.2$  Hz), 4.43 (1H, dd,  $J = 4.8$  and  $J = 11.2$  Hz), 4.85 (1H, dd,  $J = 4.0$  and  $J = 10.2$  Hz), 5.13 (2H, br), 5.66 (1H, d,  $J = 4.0$  Hz), 5.75 (1H, s), 7.96 (1H, s); (**17 $\alpha$** , selected data)  $\delta$  2.09 (3H, s), 5.18 (2H, br), 6.73 (1H, d,  $J = 4.8$  Hz), 8.62 (1H, s); NOE experiment: H-1'/H-4' (1.9%), H-8/H-2' (3.8%);  $^{13}C$  NMR ( $CDCl_3$ ) (**17 $\beta$** )  $\delta$  20.04, 20.87, 22.85, 26.86,

27.18, 45.91, 60.90, 68.01, 77.45, 78.96, 125.91, 140.80, 151.85, 153.06, 158.94, 169.13. HMBC spectra; H-1'/C-4; FAB-MS ( $m/z$ ) 500 and 502 ( $M^+ + H$ ). *Anal.* Calcd for  $C_{20}H_{30}ClN_5O_4SSi$ : C, 48.03; H, 6.05; N, 14.00. Found: C, 48.40; H, 5.98; N, 14.21.

Physical data for **18**: UV (MeOH)  $\lambda_{\max}$  326 nm ( $\epsilon$  4700) and 220 nm ( $\epsilon$  23500),  $\lambda_{\min}$  279 nm ( $\epsilon$  700);  $^1H$  NMR ( $CDCl_3$ )  $\delta$  1.00 and 1.02 (18H, each as s), 2.02 (3H, s), 3.78-3.85 (1H, m), 4.18 (1H, dd,  $J = 10.4$  and  $J = 11.4$  Hz), 4.32 (1H, dd,  $J = 4.0$  and  $J = 10.2$  Hz), 4.47 (1H, dd,  $J = 4.5$  and  $J = 11.4$  Hz), 5.14 (2H, br), 5.70 (1H, d,  $J = 4.0$  Hz), 6.23 (1H, s), 8.57 (1H, s); (**18 $\alpha$** , selected data)  $\delta$  6.73 (1H, d,  $J = 4.8$  Hz); NOE experiment: H-8/H-2' (1.1%) and H-1'/H-4' (0.8%);  $^{13}C$  NMR ( $CDCl_3$ ) (for **18 $\beta$** )  $\delta$  20.01, 20.74, 22.81, 26.86, 27.12, 29.69, 45.55, 63.07, 68.04, 78.88, 116.34, 143.58, 146.79, 159.55, 000.00, 168.43.; HMBC spectra; H-1'/C-5; FAB-MS ( $m/z$ ) 500 and 502 ( $M^+ + H$ ); (+KI) 538 and 540 ( $M^+ + H$ ). *Anal.* Calcd for  $C_{20}H_{30}ClN_5O_4SSi \cdot 1/10$  AcOEt: C, 48.15; H, 6.10; N, 13.76. Found: C, 47.85; H, 6.05; N, 13.41.

## **2-[2-*O*-Acetyl-3,5-*O*-(di-*t*-butylsilylene)-4-thio- $\beta,\alpha$ -D-ribofuranosyl]thiophene**

### **(20)**

To an  $CH_2Cl_2$  (5.0 mL) solution of **7** (102.1 mg, 0.26 mmol) was added 2-tributylstannylthiophene (0.25 mL, 0.78 mmol) and TMSOTf (0.15 mL, 0.78 mmol) at  $-70$  °C under Ar atmosphere and the reaction mixture was stirred at  $0$  °C 12.5 h. The reaction mixture was partitioned between  $CHCl_3$ /saturated aq  $NaHCO_3$  and preparative TLC (hexane/AcOEt = 10/1) of the organic layer gave **20** (84.9 mg, 79%, **20 $\beta$** /**20 $\alpha$**  =

23:1, syrup).

Physical data of **20**: UV (MeOH)  $\lambda_{\max}$  238 nm ( $\epsilon$  7300),  $\lambda_{\min}$  211 nm ( $\epsilon$  1800);  $^1\text{H}$  NMR ( $\text{CDCl}_3$ ) (**20 $\beta$** )  $\delta$  1.02 and 1.03 (18H, each as s), 2.16 (3H, s), 3.76-3.83 (1H, m), 4.12 (1H, dd,  $J = 11.0$  and  $J = 10.0$  Hz), 4.37 (1H, dd,  $J = 4.4$  and  $J = 10.0$  Hz), 4.42 (1H, dd,  $J = 3.6$  and  $J = 10.0$  Hz), 4.63 (1H, s), 5.36 (1H, d,  $J = 3.6$  Hz), 6.96 (1H, dd,  $J = 3.5$  and  $J = 5.1$  Hz), 7.08 (1H, dt,  $J = 1.2$  and  $J = 3.5$  Hz), 7.23 (1H, dd,  $J = 1.2$  and  $J = 5.1$  Hz); (**20 $\alpha$** , selected data)  $\delta$  2.07 (3H, s), 3.70 (1H, ddd,  $J = 4.6$ ,  $J = 10.0$  and  $J = 11.0$  Hz), 3.98 (1H, dd,  $J = 10.3$  and  $J = 11.0$  Hz), 4.60 (1H, d,  $J = 8.8$  Hz), 5.41 (1H, dd,  $J = 8.8$  and  $J = 9.0$  Hz), 6.90 (1H, dd,  $J = 3.4$  and  $J = 5.1$  Hz), 7.01 (1H, ddd,  $J = 0.8$ ,  $J = 1.2$  and  $J = 5.0$  Hz), 7.16 (1H, dd,  $J = 2.2$  and  $J = 4.5$  Hz); NOE experiment (**20 $\beta$** ): H-1'/H-4' (2%), H-3/H-2' (2.0%);  $^{13}\text{C}$  NMR ( $\text{CDCl}_3$ )  $\delta$  20.09, 21.10, 22.74, 26.95, 27.20, 45.26, 47.65, 68.48, 79.01, 81.12, 125.49, 125.83, 127.28, 144.97, 170.06. FAB-MS ( $m/z$ ) 415 ( $\text{M}^+ + \text{H}$ ). *Anal.* Calcd for  $\text{C}_{19}\text{H}_{30}\text{O}_4\text{S}_2\text{Si}$ : C, 55.03; H, 7.29. Found: C, 54.98; H, 7.35.

#### **2-[2-*O*-Acetyl-3,5-*O*-(di-*t*-butylsilylene)-4-thio- $\beta,\alpha$ -D-ribofuranosyl]furan (21)**

To an  $\text{CH}_2\text{Cl}_2$  (5.0 mL) solution of **7** (102.3 mg, 0.26 mmol) was added 2-tributylstannylfuran (0.25 mL, 0.78 mmol) and TMSOTf (0.15 mL, 0.78 mmol) at  $-70^\circ\text{C}$  under Ar atmosphere and the reaction mixture was stirred at  $-10^\circ\text{C}$  for 5.5 h. The reaction mixture was partitioned between  $\text{CHCl}_3$ /saturated aq  $\text{NaHCO}_3$  and preparative TLC (hexane/AcOEt = 10/1) of the organic layer gave a mixture of **20** (63

mg, 61%, **21β/21α** = 24:1, syrup): UV (MeOH)  $\lambda_{\max}$  225 nm ( $\epsilon$  11000),  $\lambda_{\min}$  206 nm ( $\epsilon$  7200);  $^1\text{H}$  NMR ( $\text{CDCl}_3$ ) (**21β**)  $\delta$  1.00 and 1.05 (18H, each as s), 2.15 (3H, s), 3.73-3.79 (1H, m), 4.08 (1H, t,  $J = J = 10.4$  Hz), 4.37 (1H, dd,  $J = 4.4$  and  $J = 10.4$  Hz), 4.42 (1H, dd,  $J = 4.0$  and  $J = 10.4$  Hz), 4.63 (1H, s), 5.36 (1H, d,  $J = 4.0$  Hz), 6.11 (1H, dt,  $J = 0.8$  and  $J = 3.2$  Hz), 6.16 (1H, dd,  $J = 2.0$ ,  $J = 3.2$  Hz), 7.25 (1H, dd,  $J = 0.8$  and  $J = 2.0$  Hz); (**21α**, selected data)  $\delta$  3.78 (1H, dd,  $J = 10.0$  and  $J = 11.2$  Hz), 6.20 (1H, dd,  $J = 2.0$  and  $J = 3.2$  Hz), 7.27 (1H, dd,  $J = 0.8$  and  $J = 2.0$  Hz); NOE experiment (for **21β**): H-1'/H-4' (2%), H-3/H-2' (1.0%);  $^{13}\text{C}$  NMR ( $\text{CDCl}_3$ ) (for **21β**)  $\delta$  20.08, 21.08, 22.74, 26.97, 27.24, 29.69, 44.97, 45.10, 68.41, 77.63, 79.99, 107.72, 142.80, 152.35, 169.72. FAB-MS ( $m/z$ ) 399 ( $\text{M}^+ + \text{H}$ ). *Anal.* Calcd for  $\text{C}_{19}\text{H}_{30}\text{O}_5\text{SSi}$ : C, 57.25; H, 7.59. Found: C, 57.28; H, 7.71.

**Reaction of 7 with cyanotrimethylsilane: (2R)-(2-Cyano-2-methyl)-1,2-dideoxy-[3,5-O-(di-*t*-butylsilylene)-4-thio- $\alpha$ -D-ribofuranoso][3,4-*d*][1,3]dioxolane (22a) and (2S)-(2-Cyano-2-methyl)-1,2-dideoxy-[3,5-O-(di-*t*-butylsilylene)-4-thio- $\alpha$ -D-ribofuranoso][3,4-*d*][1,3]dioxolane (22b)**

To a  $\text{CH}_2\text{Cl}_2$  (3.0 mL) solution of **7** (78.1 mg, 0.2 mmol) was added cyanotrimethylsilane (0.13 mL, 1.0 mmol) and TMSOTf (0.19 mL, 1.0 mmol) at  $-70^\circ\text{C}$  under Ar atmosphere and the reaction mixture was stirred at  $0^\circ\text{C}$  for 21 h. The reaction mixture was partitioned between  $\text{CHCl}_3$ /saturated aq  $\text{NaHCO}_3$  and column chromatography (hexane/AcOEt = 100/1) of the organic layer gave **22a** (19.4 mg, 27%,

solid) and **22b** (7.3 mg, 10%, solid).

Physical data for **22a** : m.p. 116-118 °C. IR (neat) 2231  $\text{cm}^{-1}$  (CN).  $^1\text{H}$  NMR ( $\text{CDCl}_3$ )  $\delta$  1.03 and 1.06 (18H, each as s), 1.86 (3H, s), 3.54-3.60 (1H, m), 3.97 (1H, dd,  $J = 11.4$  and  $J = 10.4$  Hz), 4.09 (1H, dd,  $J = 4.4$  and  $J = 10.4$  Hz), 4.32 (1H, dd,  $J = 4.4$  and  $J = 10.2$  Hz), 5.01 (1H, dd,  $J = 6.0$  and  $J = 4.4$  Hz), 5.80 (1H, d,  $J = 6.0$  Hz); NOE experiment:  $\text{CH}_3/\text{H-4}$  (3.0%);  $^{13}\text{C}$  NMR ( $\text{CDCl}_3$ )  $\delta$  20.26, 22.71, 24.26, 26.84, 27.16, 44.60, 66.39, 81.12, 81.84, 84.92, 100.34, 116.60. FAB-MS ( $m/z$ ) 358 ( $\text{M}^+ + \text{H}$ ) and 331 ( $\text{M}^+ - \text{CN}$ ). High resolution FAB-MS ( $m/z$ ) calcd for  $\text{C}_{16}\text{H}_{27}\text{F}_3\text{O}_7\text{S}_2\text{Si}$ : 481.0998. Found: 481.0962.

Physical data for **22b**: m.p. 148-151 °C. IR (neat) 2231  $\text{cm}^{-1}$  (CN).  $^1\text{H}$  NMR ( $\text{CDCl}_3$ )  $\delta$  1.06 and 1.07 (18H, each as s), 1.86 (3H, s), 3.90 (1H, t,  $J = J = 10.4$  Hz), 4.04-4.12 (2H, m), 4.37 (1H, dd,  $J = 4.4$  and  $J = 9.6$  Hz), 4.81 (1H, dd,  $J = 4.8$  and  $J = 4.4$  Hz), 6.03 (1H, d,  $J = 4.8$  Hz);  $^{13}\text{C}$  NMR ( $\text{CDCl}_3$ )  $\delta$  20.26, 22.76, 26.97, 27.09, 27.17, 46.70, 67.67, 81.59, 83.83, 86.51, 101.34, 117.79. FAB-MS ( $m/z$ ) 358 ( $\text{M}^+ + \text{H}$ ) and 331 ( $\text{M}^+ - \text{CN}$ ). High resolution FAB-MS ( $m/z$ ) calcd for  $\text{C}_{16}\text{H}_{28}\text{O}_4\text{NSSi}$ : 358.1508. Found: 358.1489.

### **2-O-Acetyl-1-phenylthio-3,5-O-(di-*t*-butylsilylene)- $\beta,\alpha$ -D-4-thioribofuranose (23)**

To a  $\text{CH}_2\text{Cl}_2$  (5.0 mL) solution of **7** (242.6 mg, 0.62 mmol) was added TMSSPh (0.59 mL, 3.1 mmol) and  $\text{SnCl}_4$  (1 M solution in  $\text{CH}_2\text{Cl}_2$ ) (1.9 mL, 1.86 mmol) at  $-70$  °C under Ar atmosphere and the reaction mixture was stirred at  $-10$  °C for 10 h. The



reaction mixture was partitioned between  $\text{CHCl}_3$ /saturated aq  $\text{NaHCO}_3$  and column chromatography (hexane/AcOEt = 100/1) of the organic layer gave **23** (237.5 mg, 87%, syrup,  $\beta$ -isomer/ $\alpha$ -isomer = 24/1): UV (MeOH)  $\lambda_{\text{max}}$  253 nm ( $\epsilon$  5100),  $\lambda_{\text{min}}$  242 nm ( $\epsilon$  4700);  $^1\text{H}$  NMR ( $\text{CDCl}_3$ ) ( $\beta$ -isomer)  $\delta$  0.98 and 1.02 (18H, each as s, Si-*t*-Bu), 2.08 (3H, s, Ac), 3.68 (1H, ddd,  $J = 4.4$ ,  $J = 10.7$  and  $J = 10.7$  Hz), 4.00 (1H, t,  $J = J = 10.7$  Hz), 4.27-4.30 (2H, m), 4.47 (1H, s), 5.52 (1H, d,  $J_{2,3} = 3.4$  Hz); ( $\alpha$ -isomer, selected data)  $\delta$  2.05 (3H, s, Ac), 3.31 (1H, ddd,  $J = 4.4$ ,  $J = J = 10.4$  Hz), 4.56 (1H,  $J = 7.6$  Hz), 3.31 (1H, dd,  $J = 7.6$  and  $J = 9.0$  Hz); NOE experiment ( $\beta$ -isomer): H-1/H-4 (0.7%);  $^{13}\text{C}$  NMR ( $\text{CDCl}_3$ )  $\delta$  20.05, 20.95, 22.67, 26.92, 27.24, 45.21, 53.72, 68.39, 78.60, 79.46, 128.34, 129.16, 132.49, 133.85, 169.55. FAB-MS ( $m/z$ ) 441 ( $\text{M}^+ + \text{H}$ ). *Anal.* Calcd for  $\text{C}_{21}\text{H}_{32}\text{O}_4\text{S}_2\text{Si}$ : C, 57.23; H, 7.32. Found: C, 57.44; H, 7.37.

**2-*O*-(*t*-Butyldimethylsilyl)-3,5-*O*-(di-*t*-butylsilylene)-1-phenylthio- $\beta,\alpha$ -D-4-thioribofuranose (**24**)**

Compound **23** (224.5 mg, 0.51 mmol) was treated with methanolic ammonia (20 mL) at rt overnight. The reaction mixture was evaporated to dryness and the residue was dried in vacuo overnight. To a DMF (5 mL) solution of the residue was added imidazole (520.8 mg, 7.65 mmol) and TBDMSCl (922.3 mg, 6.12 mmol) at 0 °C under Ar atmosphere and the mixture was stirred at rt overnight. The reaction mixture was partitioned between AcOEt/ $\text{H}_2\text{O}$  and column chromatography (hexane/AcOEt = 200/1) of the organic layer gave **24** (232.9 mg, 89%,  $\beta$ -isomer/ $\alpha$ -isomer = 24/1) as a solid: mp

72-74 °C; UV (MeOH)  $\lambda_{\max}$  263 nm ( $\epsilon$  2900),  $\lambda_{\min}$  254 nm ( $\epsilon$  2800);  $^1\text{H}$  NMR ( $\text{CDCl}_3$ )  $\delta$  -0.24 and 0.05 (6H, each as s, Si-*t*-Bu), 0.80 (9H, s), 0.99 and 1.06 (18H, each as s), 3.68-3.73 (1H, m), 4.01 (1H, t,  $J = J = 11.2$  Hz), 4.25 (1H, s), 4.26-4.30 (3H, m), 7.33-7.35 and 7.51-7.54 (5H, each as m); ); ( $\alpha$ -isomer, selected data)  $\delta$  3.32-3.38 (1H, m), 4.49 (1H,  $J = 7.2$  Hz); NOE experiment ( $\beta$ -isomer): H-1/H-4 (1.0%);  $^{13}\text{C}$  NMR ( $\text{CDCl}_3$ )  $\delta$  -5.57, -4.33, 18.01, 20.09, 22.73, 25.75, 26.97, 27.53, 44.26, 58.06, 69.03, 79.57, 79.76, 128.70, 129.27, 134.08, 134.24. FAB-MS ( $m/z$ ) 455 ( $\text{M}^+ - t\text{-Bu}$ ) and 551 ( $\text{M}^+ + \text{K}$ ). *Anal.* Calcd for  $\text{C}_{25}\text{H}_{44}\text{O}_3\text{S}_2\text{Si}_2$ : C, 58.54; H, 8.65. Found: C, 58.71; H, 8.91.

**1-*O*-Acetoxy-2-*O*-(*t*-butyldimethylsilyl)-3,5-*O*-(di-*t*-butylsilylene)- $\beta$ -D-4-thioribofuranose (**25**)**

To an AcOH (3.8 mL, 67.08 mmol) solution of **24** (221.1 mg, 0.43 mmol) was added  $\text{Hg}(\text{OAc})_2$  (602.9 mg, 1.89 mmol) at rt under Ar atmosphere and the mixture was stirred at rt for 14 h. The reaction mixture was diluted with  $\text{CHCl}_3$ . The solution washed with  $\text{H}_2\text{O}$ , saturated  $\text{NaHCO}_3$  and 5% KCN. Silica gel column chromatography (hexane/AcOEt = 150/1) of the organic layer gave **25** (190.6 mg, 96%,  $\beta$ -isomer/ $\alpha$ -isomer = 24/1) as a solid: mp 104-105 °C.  $^1\text{H}$  NMR ( $\text{CDCl}_3$ )  $\delta$  0.13 and 0.15 (6H, each as s), 0.92 (9H, s), 1.02 and 1.07 (18H, each as s), 2.08 (3H, s), 3.70 (1H, ddd,  $J = 4.6$ ,  $J = 11.4$  and  $J = 3.2$  Hz), 4.01 (1H, dd,  $J = 11.4$  and  $J = 10.0$  Hz), 4.16 (1H, dd,  $J = 3.2$  and  $J = 10.0$  Hz), 4.28-4.32 (2H, m), 5.60 (1H, d,  $J = 0.7$  Hz); ( $\alpha$ -isomer, selected data)  $\delta$  2.09 (1H, s), 3.91 (1H, d,  $J = 11.2$  and  $J = 10.0$  Hz), 5.66 (1H,  $J = 5.2$  Hz); NOE

experiment : H-1/H-4 (0.7%);  $^{13}\text{C}$  NMR ( $\text{CDCl}_3$ )  $\delta$  -5.20, -4.38, 18.16, 20.15, 21.10, 22.76, 25.81, 27.00, 27.47, 43.53, 69.06, 77.44, 80.05, 82.32, 169.59. FAB-MS ( $m/z$ ) 463 ( $\text{M}^+ + \text{H}$ ) and 403 ( $\text{M}^+ - \text{OAc}$ ). *Anal.* Calcd for  $\text{C}_{21}\text{H}_{42}\text{O}_5\text{SSi}_2$ : C, 54.50; H, 9.15. Found: C, 54.39; H, 9.33.

**1-C-Cyano-2-(*t*-butyldimethylsilyl)-3,5-*O*-(di-*t*-butylsilylene)- $\beta$ -D-4-thioribofuranose (27)**

To a  $\text{CH}_2\text{Cl}_2$  (5 mL) solution of **25** (159.9 mg, 0.35 mmol) was added TMSBr (0.28 mL, 2.1 mmol) at 0 °C under Ar atmosphere and the mixture was stirred at rt for 27 h. To the reaction mixture was added  $\text{Hg}(\text{CN})_2$  (884.2 mg, 3.5 mmol) and  $\text{CH}_3\text{CN}$  (5 mL) and the mixture was stirred at rt for 22 h. The reaction mixture was partitioned between  $\text{CHCl}_3$  and saturated aq  $\text{NaHCO}_3$  and column chromatography (hexane/AcOEt = 100/1) of the organic layer gave **27** (95.1 mg, 63%) as a solid: mp 137-139 °C. IR (neat) 2241  $\text{cm}^{-1}$  (CN).  $^1\text{H}$  NMR ( $\text{CDCl}_3$ )  $\delta$  0.15 and 0.18 (12H, each as s), 0.93 (9H, s), 1.01 and 1.06 (18H, each as s), 3.58 (1H, s), 3.77 (1H, ddd,  $J = 3.1$ ,  $J = 11.2$  and  $J = 4.6$  Hz), 4.08 (1H, dd,  $J = 11.2$  and  $J = 10.1$  Hz), 4.21 (1H, dd,  $J = 3.2$  and  $J = 10.1$  Hz), 4.33 (1H, dd,  $J = 4.6$  and  $J = 10.1$  Hz), 4.60 (1H, d,  $J = 3.1$  Hz); NOE experiment: H-1/H-4 (0.9%);  $^{13}\text{C}$  NMR ( $\text{CDCl}_3$ )  $\delta$  -5.30, -4.40, 18.11, 20.09, 22.75, 25.76, 26.91, 27.37, 35.51, 44.23, 68.31, 77.57, 81.86, 118.34. FAB-MS ( $m/z$ ) 430 ( $\text{M}^+ + \text{H}$ ). *Anal.* Calcd for  $\text{C}_{20}\text{H}_{39}\text{NO}_3\text{SSi}_2$ : C, 55.89; H, 9.15; N, 3.26. Found: C, 55.96; H, 9.32; N, 3.18.

**Ethyl 2-[2-*O*-(*t*-butyldimethylsilyl)-3,5-*O*-(di-*t*-butylsilylene)- $\beta$ -D-4-**

**thioribofuranosyl]-thiazole-4-carboxylate (29)**

To a  $\text{ClCH}_2\text{CH}_2\text{Cl}$  (6.0 mL) solution of **27** (95.6 mg, 0.063 mmol) was added ethyl cystein hydrochloride (246.4 mg, 1.32 mmol) and *i*-Pr<sub>2</sub>NEt (0.23 mL, 1.32 mmol) at 0 °C under Ar atmosphere and the mixture was stirred at rt for 5 days. The reaction mixture was partitioned between  $\text{CHCl}_3$  and saturated aq  $\text{NH}_4\text{Cl}$  and column chromatography (hexane/AcOEt = 20/1) of the organic layer gave **27** (99 mg, solid, 80%). To a  $\text{CH}_2\text{Cl}_2$  (6.0 mL) solution of **28** was added DBN (49  $\mu\text{L}$ , 0.40 mmol) and  $\text{BrCCl}_3$  (27  $\mu\text{L}$ , 0.27 mmol) at 0 °C under Ar atmosphere and the mixture was stirred at rt for 6 h. The reaction mixture was partitioned between  $\text{CHCl}_3$  and saturated aq  $\text{NH}_4\text{Cl}$  and column chromatography (hexane/AcOEt = 40/1) of the organic layer gave **29** (89.2 mg, 88%) as a syrup: UV (MeOH) $\lambda_{\text{max}}$  237 nm ( $\epsilon$  7700),  $\lambda_{\text{min}}$  222 nm ( $\epsilon$  5900);  $^1\text{H}$  NMR ( $\text{CDCl}_3$ ) $\delta$  0.16 and 0.24 (6H, each as s), 0.97 (9H, s), 1.02 and 1.02 (18H, each as s), 1.40 (3H, t,  $J$  = 7.1 Hz), 3.86 (1H, ddd,  $J$  = 4.6,  $J$  = 10.8 and  $J$  = 10.9 Hz), 4.10 (1H, dd,  $J$  = 11.2 and  $J$  = 10.8 Hz), 4.27 (1H, dd,  $J$  = 3.1 and  $J$  = 10.9 Hz), 4.37-4.40 (3H, m), 4.53 (1H, s), 4.59 (1H, d,  $J$  = 3.1 Hz), 8.09 (1H, s).; NOE experiment: H-1'/H-4' (1.6%);  $^{13}\text{C}$  NMR ( $\text{CDCl}_3$ )  $\delta$  -4.98, -4.20, 14.26, 18.14, 20.09, 22.77, 25.87, 26.96, 27.40, 44.40, 53.00, 61.37, 68.98, 79.98, 80.37, 128.12, 147.97, 161.37, 173.86. FAB-MS ( $m/z$ ) 560 ( $\text{M}^+ + \text{H}$ ). *Anal.* Calcd for  $\text{C}_{25}\text{H}_{45}\text{NO}_5\text{S}_2\text{Si}_2$ : C, 53.63; H, 8.10; N, 2.50. Found: C, 53.37; H, 8.37; N, 2.49.

**2-[2-*O*-(*t*-butyldimethylsilyl)-3,5-*O*-(di-*t*-butylsilylene)- $\beta$ -D-4-thioribofuranosyl]-**

### thiazole-4-carboxamide (**30**)

Compound **29** (86 mg, 0.15 mmol) was treated with methanolic ammonia (20 mL) at rt for 9 h. The reaction mixture was evaporated to dryness and the residue was chromatographed (hexane/AcOEt = 5/1) on a silica gel to give **30** (78.8 mg, 99%) as a solid: mp 168-169 °C; UV (MeOH)  $\lambda_{\max}$  234 nm ( $\epsilon$  8240),  $\lambda_{\min}$  228 nm ( $\epsilon$  8170);  $^1\text{H}$  NMR ( $\text{CDCl}_3$ )  $\delta$  0.18 and 0.24 (6H, each as s), 0.99 (9H, s), 1.02 and 1.03 (18H, each as s), 3.87 (1H, ddd,  $J = 10.0$ ,  $J = 11.2$  and  $J = 4.6$  Hz), 4.10 (1H, dd,  $J = 11.2$  and  $J = 10.0$  Hz), 4.22 (1H, dd,  $J = 3.2$  and  $J = 10.0$  Hz), 4.40 (1H, dd,  $J = 4.6$  and  $J = 10.0$  Hz), 4.47 (1H, s), 4.56 (1H, d,  $J = 3.2$  Hz), 5.86 and 7.03 (2H, each as br), 8.08 (1H, s).; NOE experiment: H-1'/H-4' (1.6%);  $^{13}\text{C}$  NMR ( $\text{CDCl}_3$ )  $\delta$  -4.99, -4.23, 18.24, 20.10, 22.79, 25.89, 26.95, 27.37, 44.34, 52.77, 68.91, 76.74, 80.21, 125.05, 150.14, 162.82, 173.57. FAB-MS ( $m/z$ ) 531 ( $\text{M}^+ + \text{H}$ ) and 473 ( $\text{M}^+ - t\text{-Bu}$ ). *Anal.* Calcd for  $\text{C}_{23}\text{H}_{42}\text{N}_2\text{O}_4\text{S}_2\text{Si}_2$ : C, 52.03; H, 7.97; N, 5.28. Found: C, 52.10; H, 8.12; N, 5.23.

### 4'-Thiotiazofurin (**31**)

To a stirred THF (5 mL) solution of **30** (88.8 mg, 0.17 mmol) was added  $\text{Bu}_4\text{NF} \cdot 3\text{H}_2\text{O}$  (172.6 mg, 0.66 mmol) and the mixture was stirred at rt for 3 h. The reaction mixture was evaporated to dryness and the residue was chromatographed (8% MeOH in  $\text{CH}_2\text{Cl}_2$ ) on a silica gel to give **31** (44.1 mg, 94%) as a solid: mp 171-172 °C; UV (MeOH)  $\lambda_{\max}$  234 nm ( $\epsilon$  8100),  $\lambda_{\min}$  226 nm ( $\epsilon$  8000);  $^1\text{H}$  NMR ( $\text{CD}_3\text{OD}$ )  $\delta$  3.45 (1H, dt,  $J = 4.0$  and  $J = 6.3$  Hz), 3.67 (1H, dd,  $J = 6.3$  and  $J = 11.5$  Hz), 3.79 (1H, dd,  $J$

= 6.3 and  $J = 11.5$  Hz), 4.20 (1H, t,  $J = 4.0$  Hz), 4.37 (1H, dd,  $J = 4.0$  and  $J = 6.3$  Hz), 4.68 (1H, d,  $J = 6.3$  Hz), 8.14 (1H, s);  $^{13}\text{C}$  NMR ( $\text{CDCl}_3$ )  $\delta$  51.3, 54.1, 65.5, 76.8, 81.9, 126.2, 150.9, 165.6, 174.1; FAB-MS ( $m/z$ ) 277 ( $\text{M}^+ + \text{H}$ ).  
*Anal.* Calcd for  $\text{C}_9\text{H}_{12}\text{N}_2\text{O}_4\text{S}_2$ : C, 39.12; H, 4.38; N, 10.14. Found: C, 39.04; H, 4.24; N, 9.74.

Fig. 1:  $^1\text{H}$  NMR and  $^{13}\text{C}$  NMR spectrum of compound (*S<sub>R</sub>*)-**6** in  $\text{CDCl}_3$

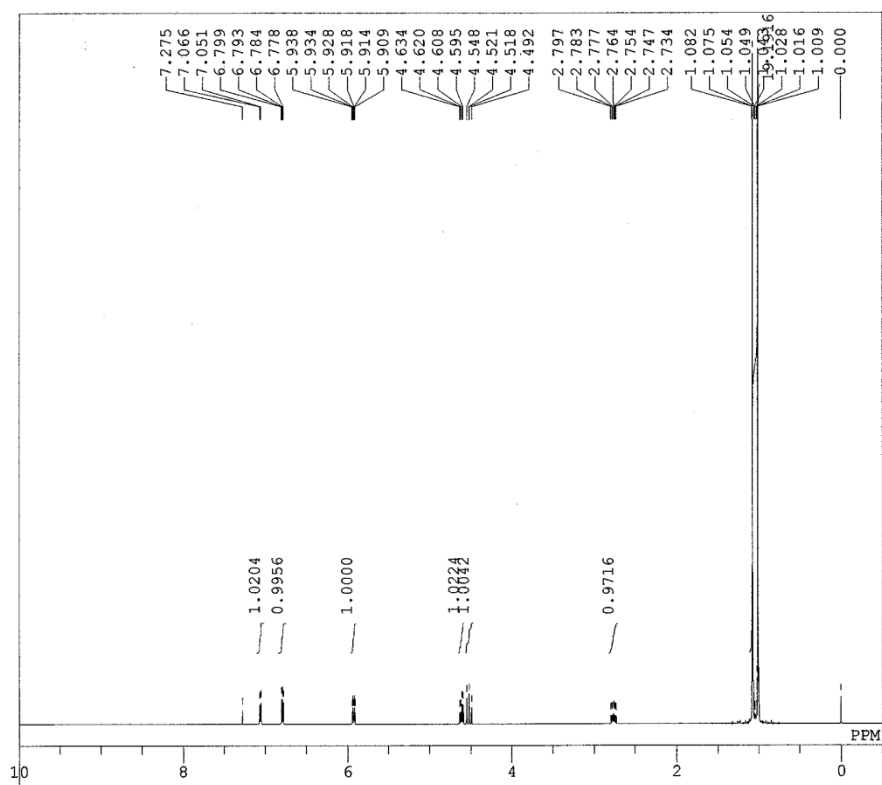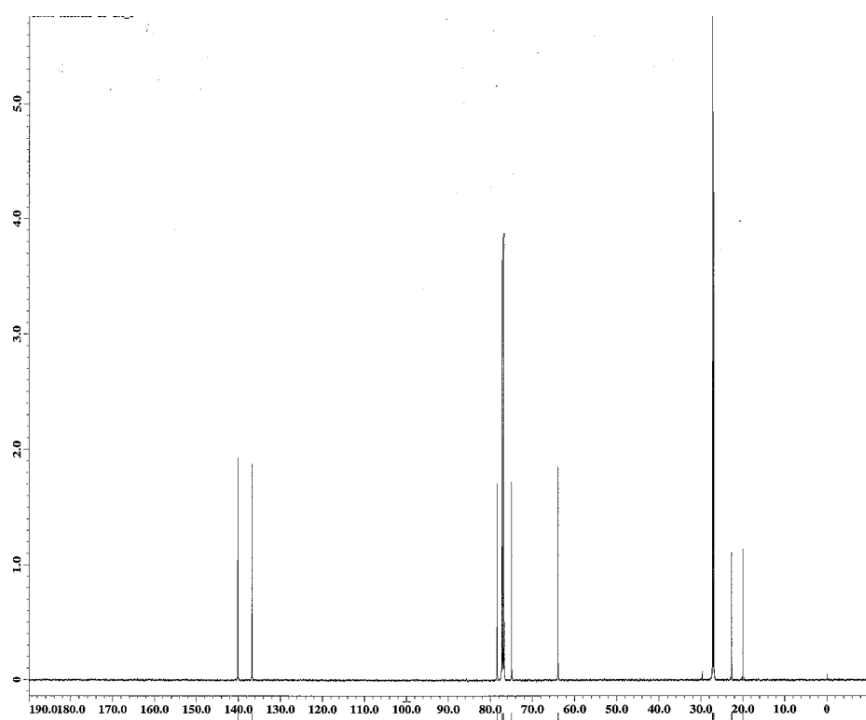

Fig. 2: <sup>1</sup>H NMR and <sup>13</sup>C NMR spectrum of compound (*S*)-6 in CDCl<sub>3</sub>

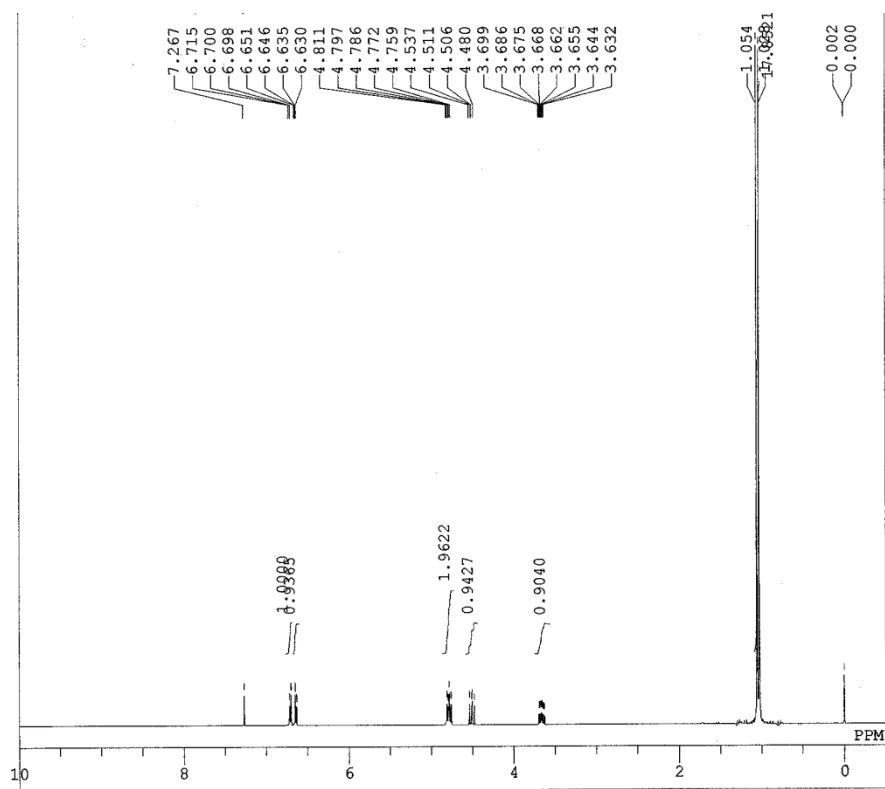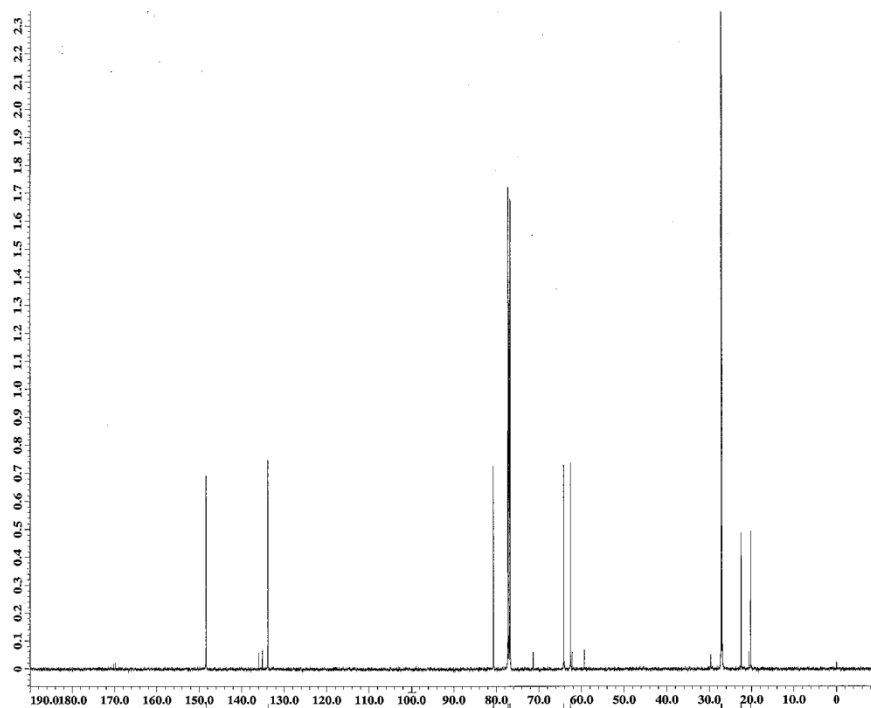



Fig. 3:  $^1\text{H}$  NMR and  $^{13}\text{C}$  NMR spectrum of compound **7b** in  $\text{CDCl}_3$

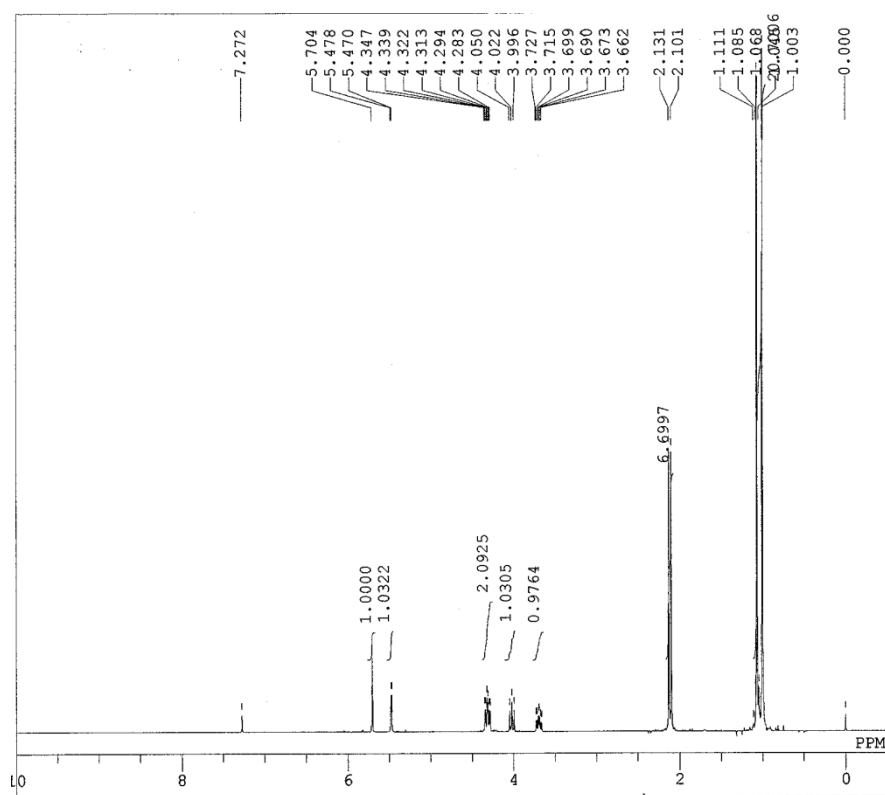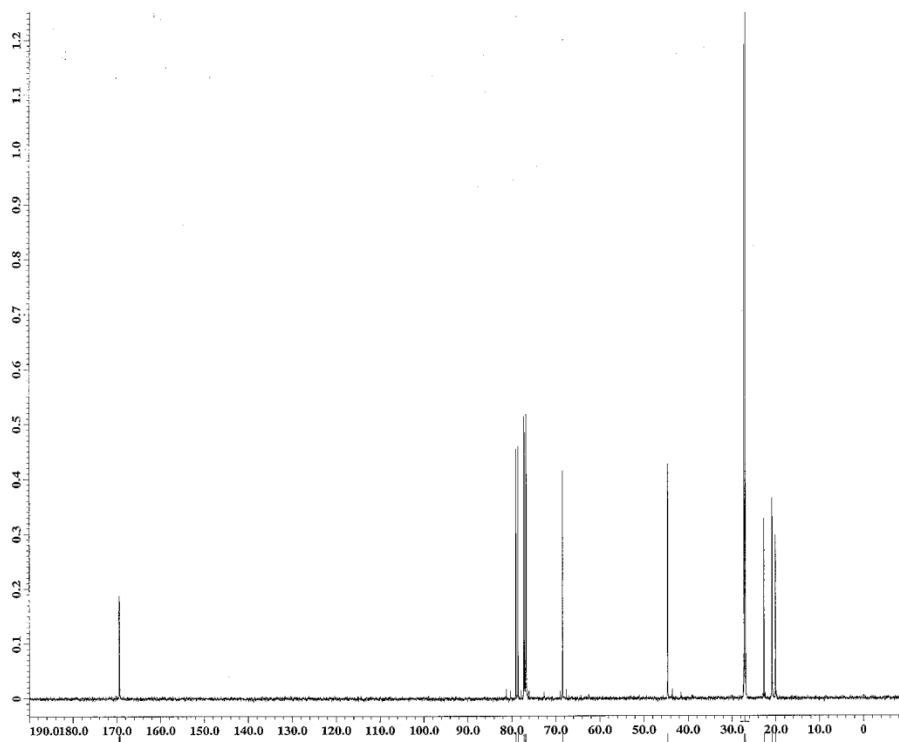

Fig. 4:  $^1\text{H}$  NMR and  $^{13}\text{C}$  NMR spectrum of compound **7a** in  $\text{CDCl}_3$

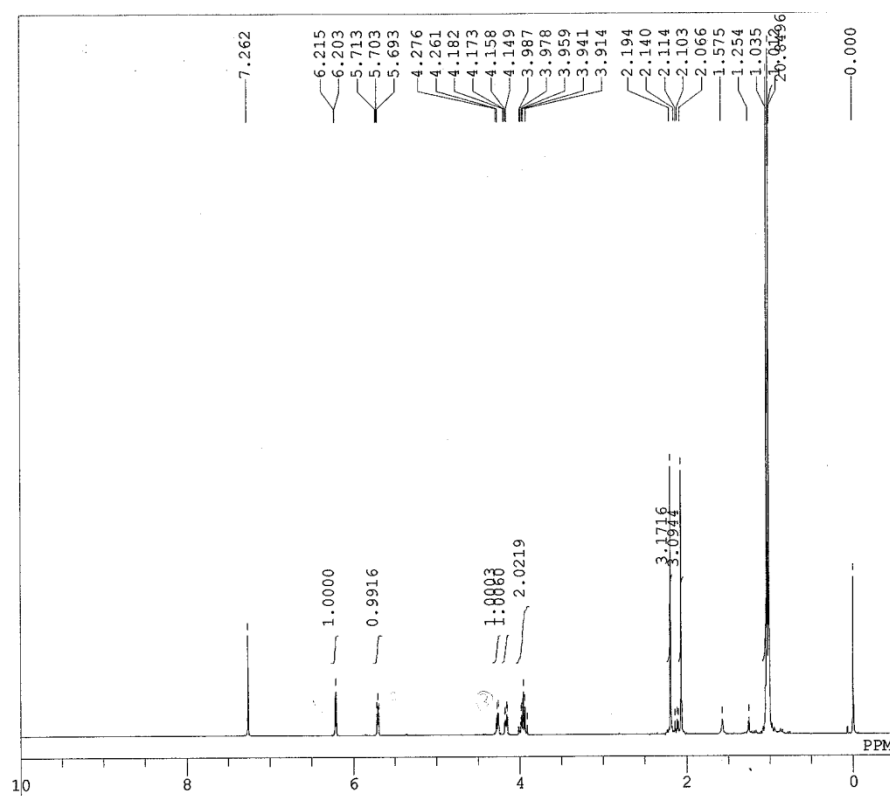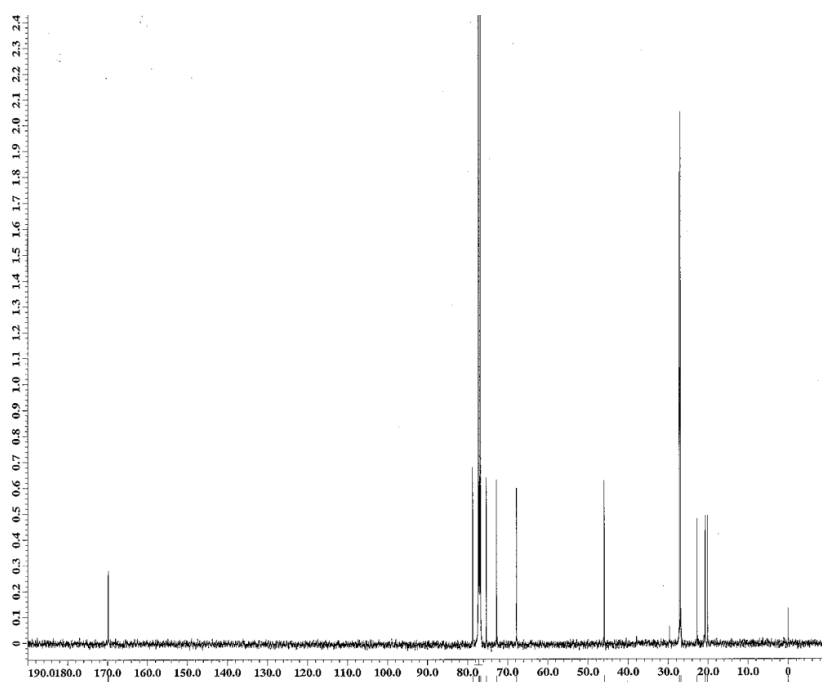

Fig. 5:  $^1\text{H}$  NMR and  $^{13}\text{C}$  NMR spectrum of compound **12 $\beta$**  in  $\text{CDCl}_3$

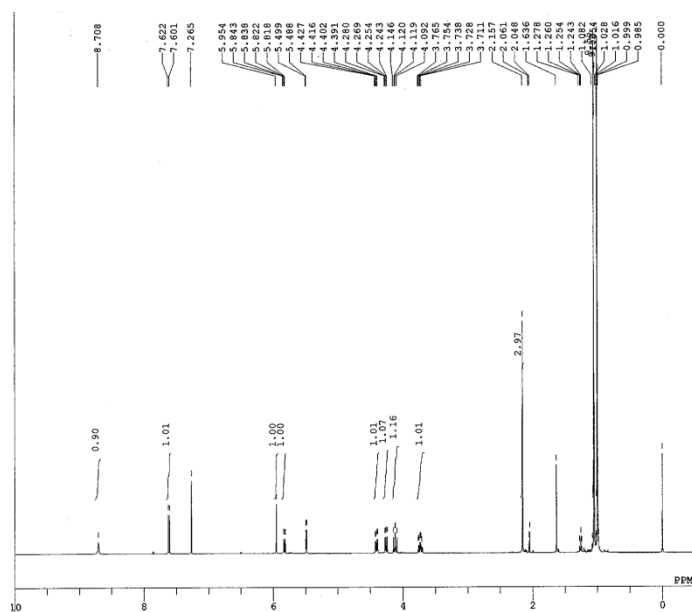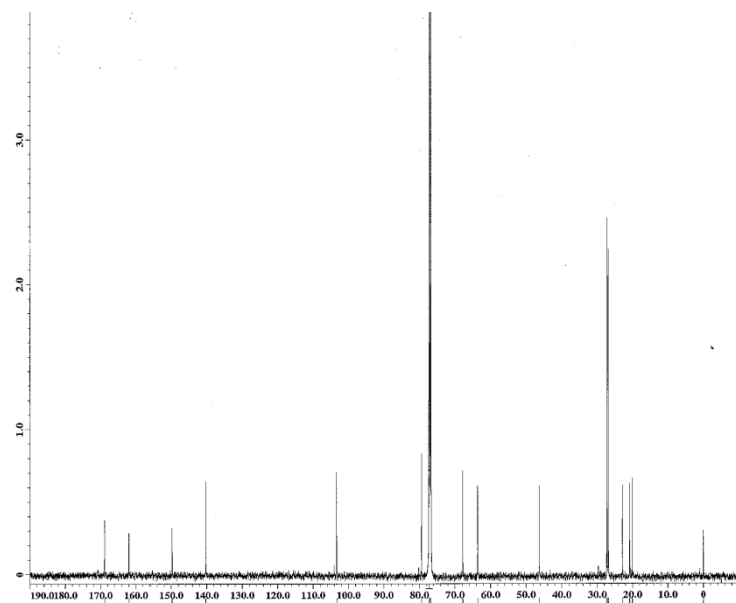

<sup>1</sup>H NMR spectrum (CDCl<sub>3</sub>) of compound 10. The x-axis represents chemical shift in PPM, ranging from 0 to 10. The spectrum shows several peaks with integration values and a list of chemical shifts on the right.

Integration values (from left to right): 1.00, 0.16, 0.05, 0.99, 0.04, 0.99, 0.98, 2.07, 1.24, 1.02, 2.93, 3.05.

Chemical shifts (ppm) (from left to right): 9.675, 7.338, 7.302, 7.300, 5.979, 5.978, 5.542, 5.540, 4.413, 4.402, 4.388, 4.386, 4.363, 4.350, 4.350, 4.338, 4.336, 4.146, 4.144, 4.136, 4.131, 4.113, 4.111, 3.744, 3.732, 3.730, 3.706, 3.690, 3.679, 3.679, 2.309, 2.296, 2.228, 2.146, 2.119, 2.108, 2.108, 1.988, 1.988, 1.959, 1.956, 1.938, 1.938, 1.915, 1.915, 1.758, 1.758, 1.240, 1.229, 1.229, 1.229, 1.086, 1.068, 1.059, 1.059, 1.017, 1.017, 1.010, 1.003, 0.954, 0.954, 0.900, 0.900.

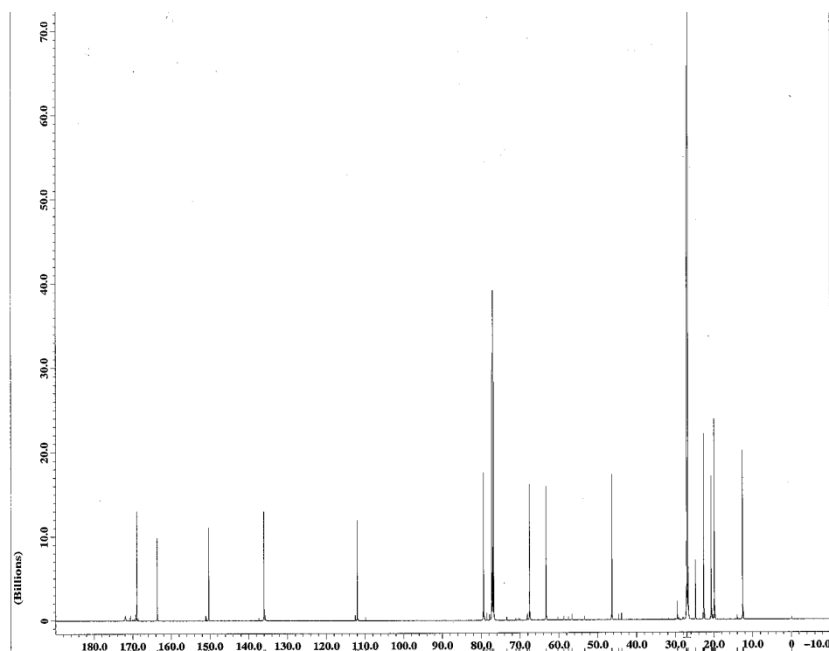

Fig. 7:  $^1\text{H}$  NMR and  $^{13}\text{C}$  NMR spectrum of compound **14b** in  $\text{CDCl}_3$

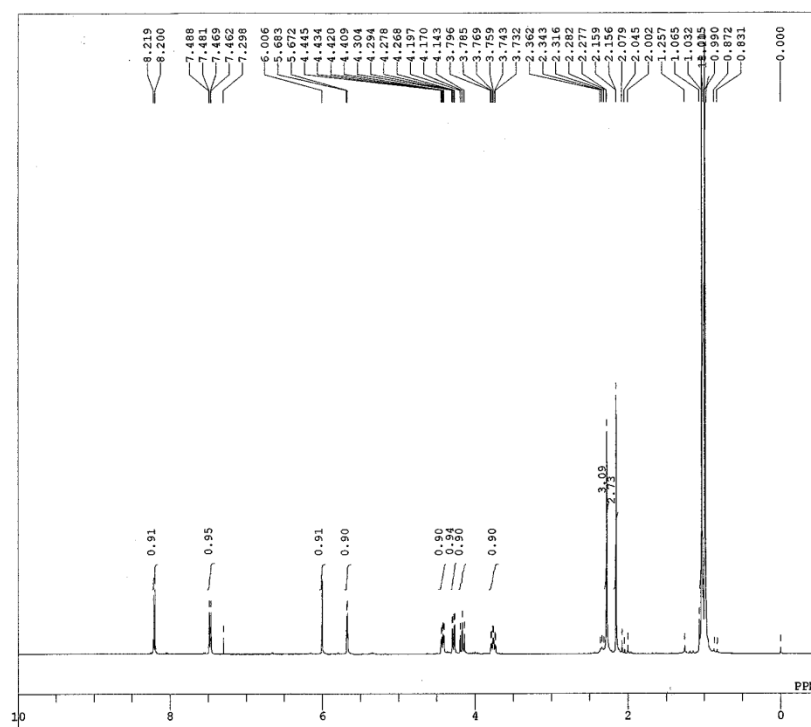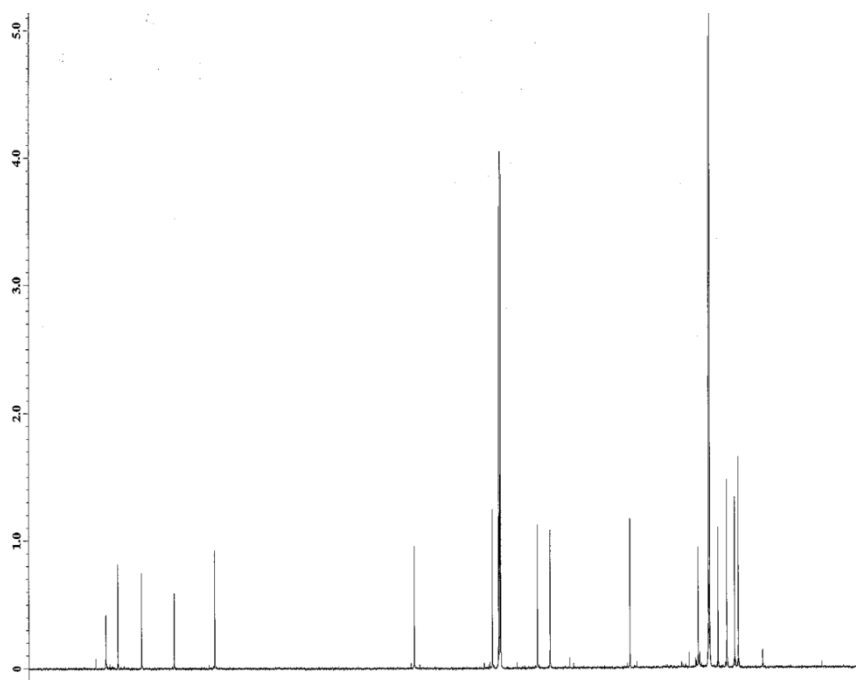

Fig. 8:  $^1\text{H}$  NMR and  $^{13}\text{C}$  NMR spectrum of compound **15 $\beta$**  in  $\text{CDCl}_3$

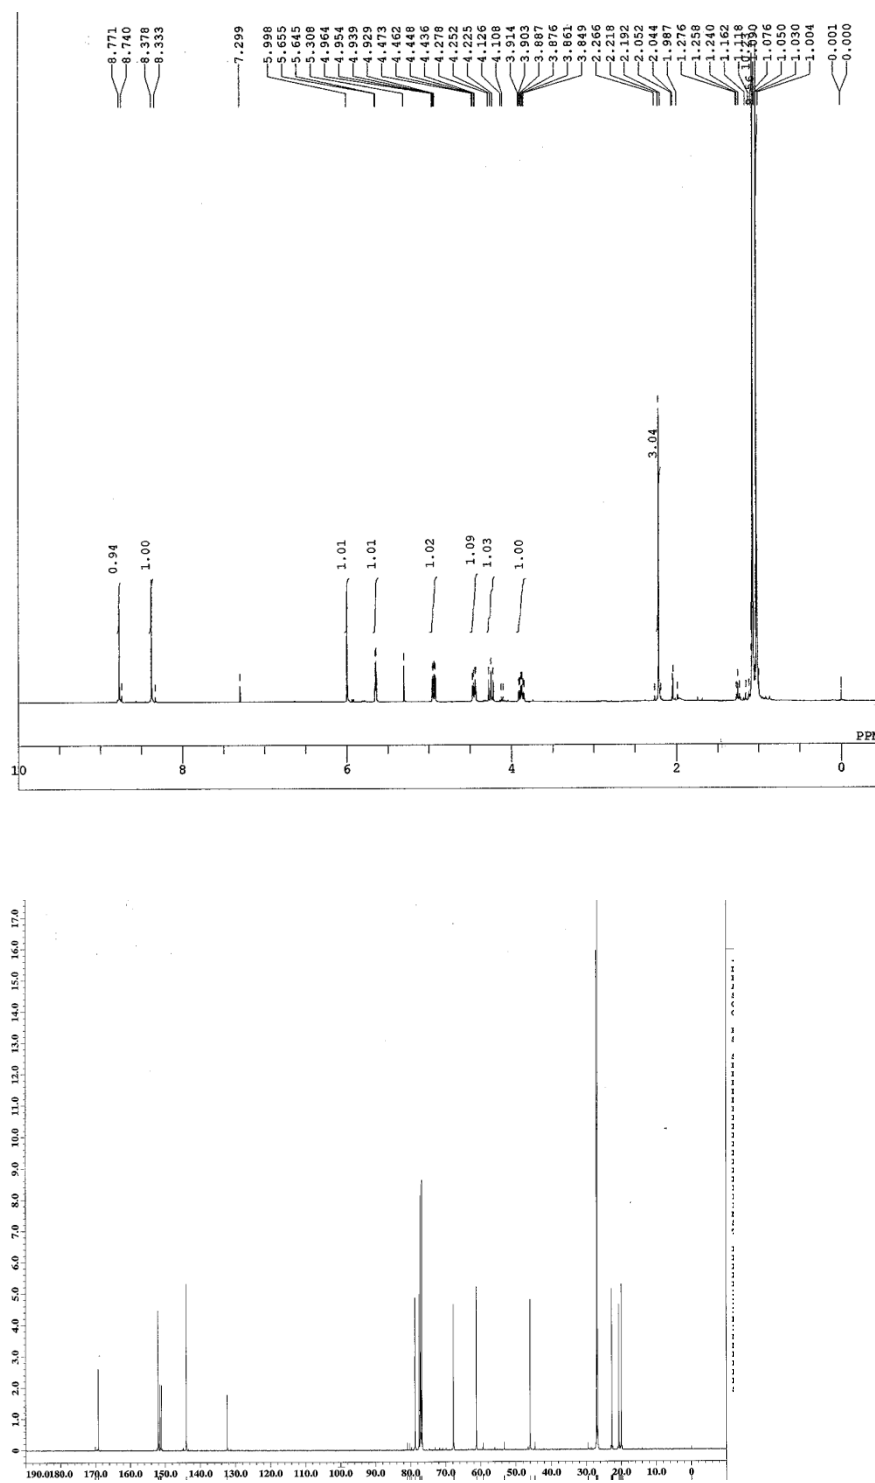

Fig. 9:  $^1\text{H}$  NMR and  $^{13}\text{C}$  NMR spectrum of compound **16 $\beta$**  in  $\text{CDCl}_3$

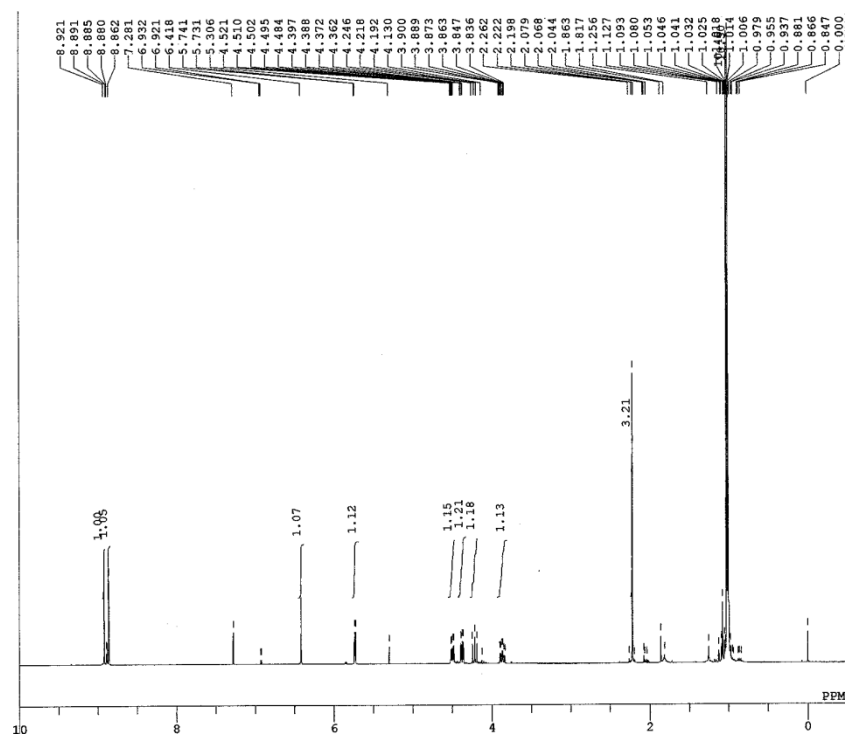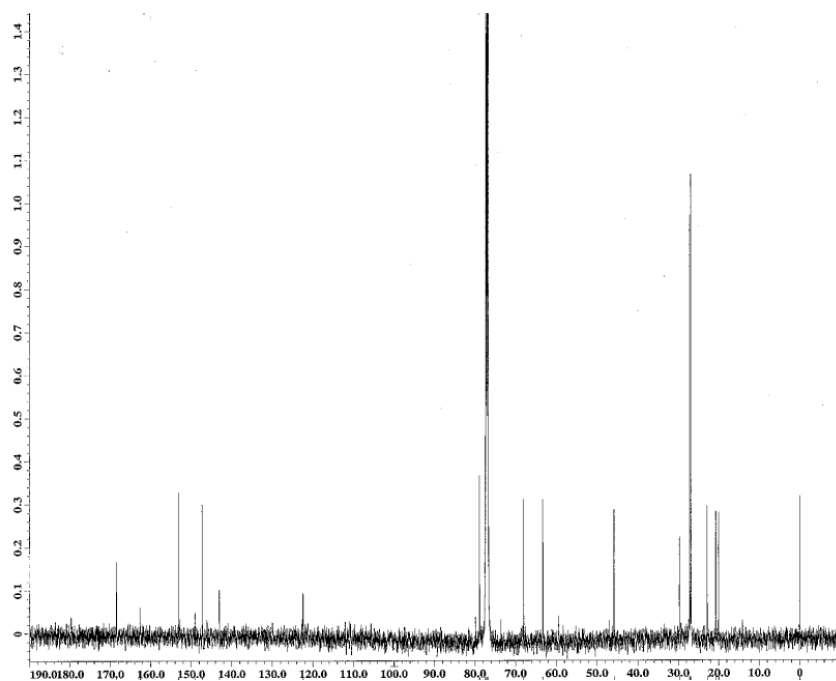

Fig. 10:  $^1\text{H}$  NMR and  $^{13}\text{C}$  NMR spectrum of compound **17b** in  $\text{CDCl}_3$

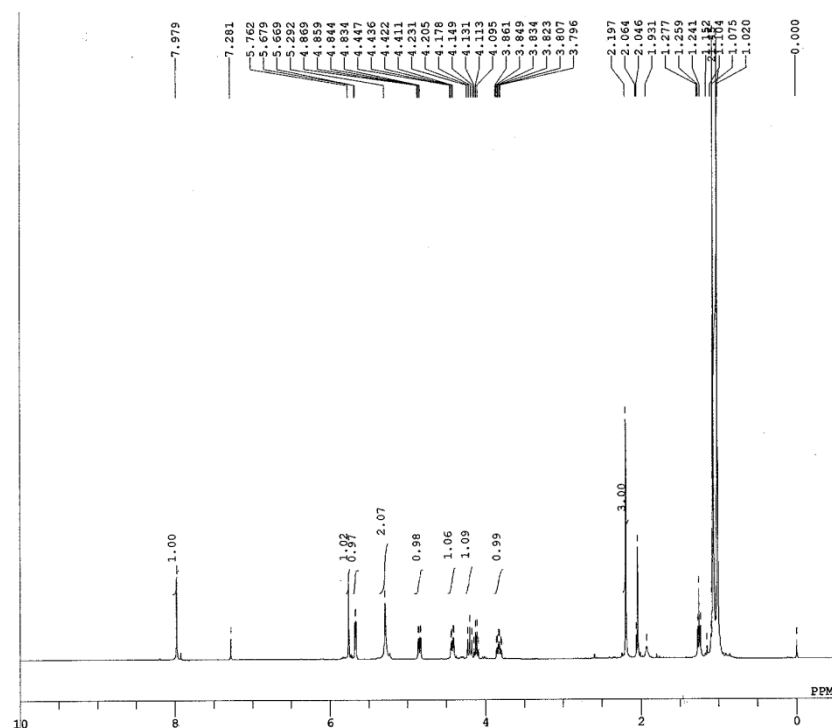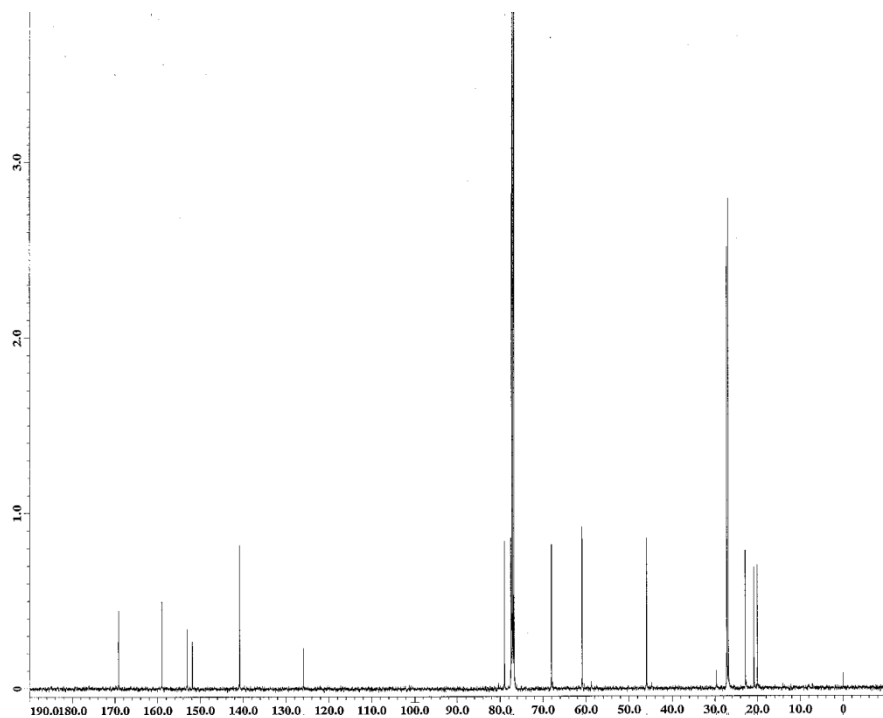



Fig. 11:  $^1\text{H}$  NMR and  $^{13}\text{C}$  NMR spectrum of compound **18 $\beta$**  in  $\text{CDCl}_3$

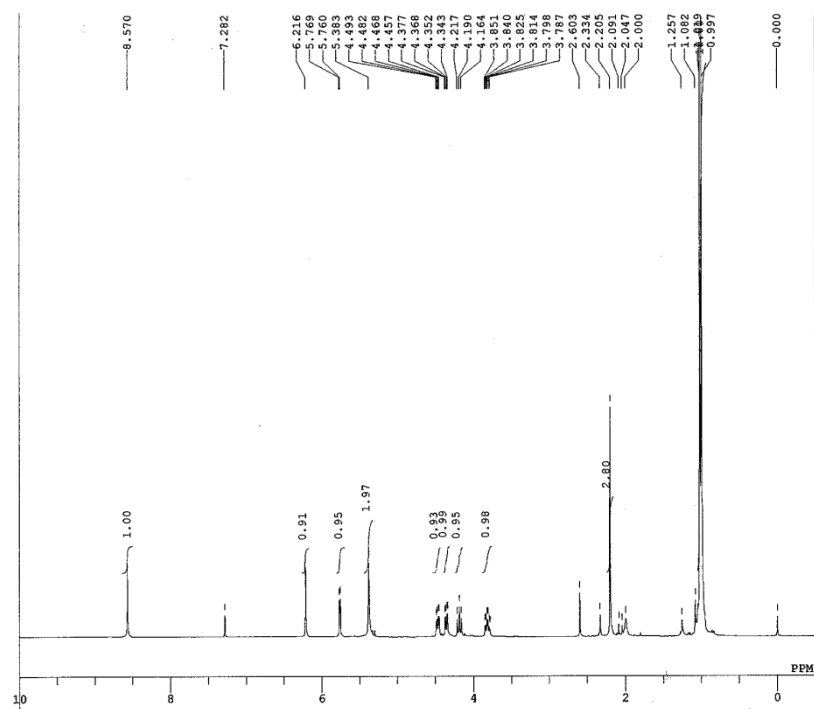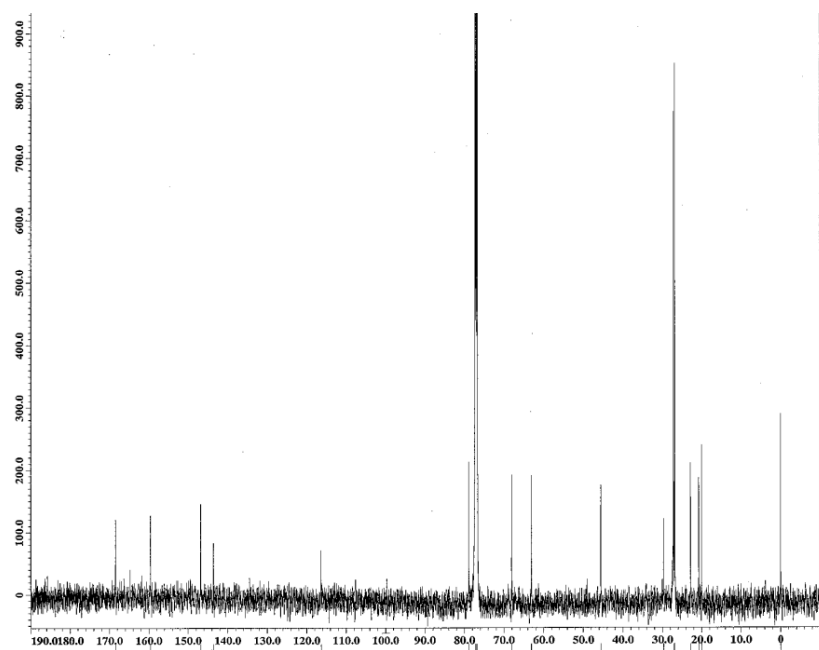

Fig. 12:  $^1\text{H}$  NMR and  $^{13}\text{C}$  NMR spectrum of compound **20 $\beta$**  in  $\text{CDCl}_3$

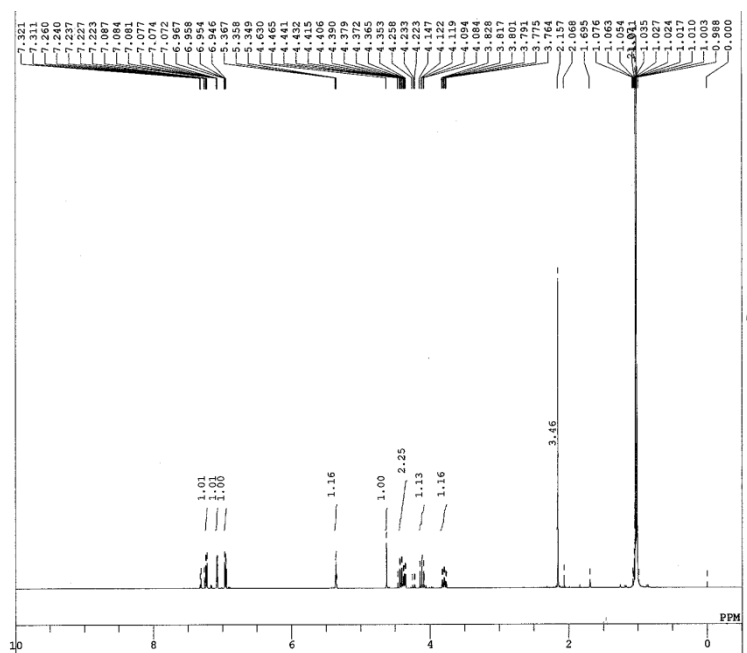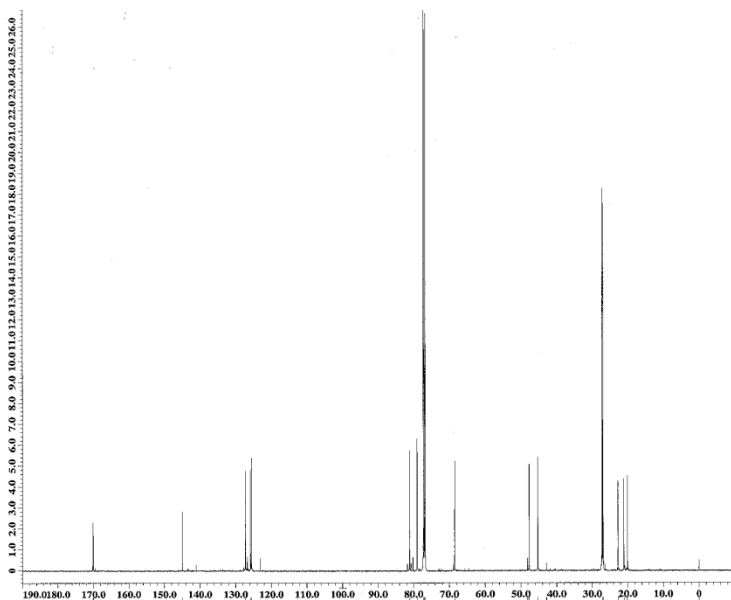

Fig. 13:  $^1\text{H}$  NMR and  $^{13}\text{C}$  NMR spectrum of compound **21b** in  $\text{CDCl}_3$

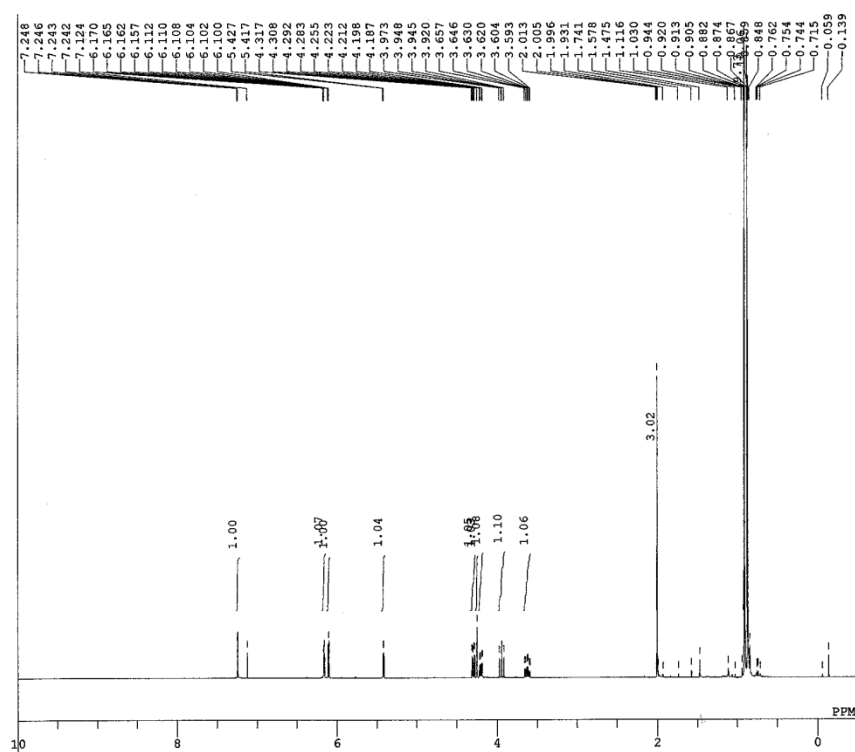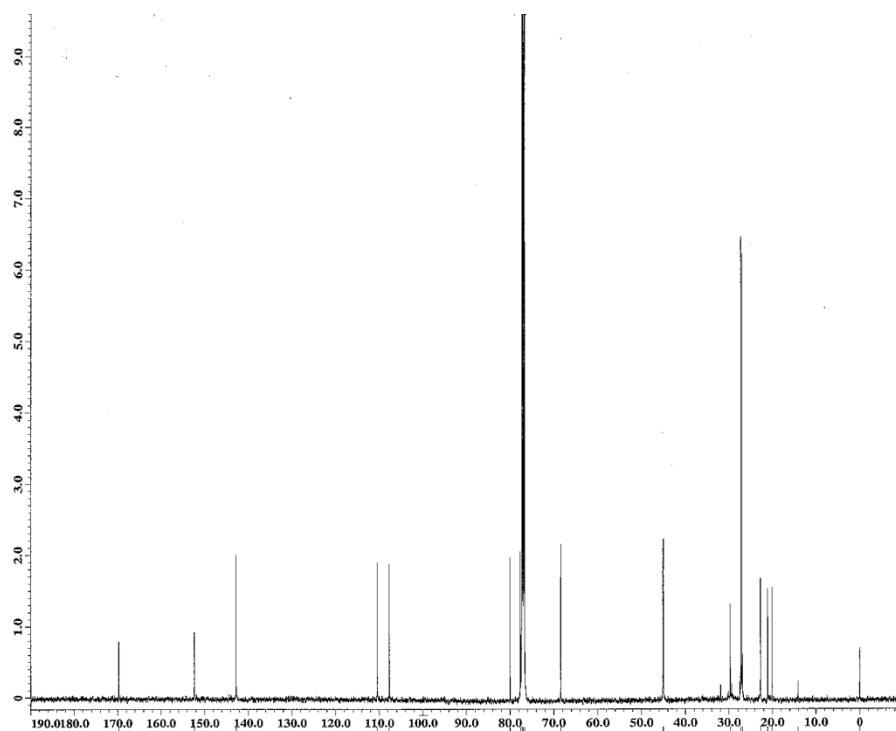

Fig. 14:  $^1\text{H}$  NMR and  $^{13}\text{C}$  NMR spectrum of compound **22a** in  $\text{CDCl}_3$

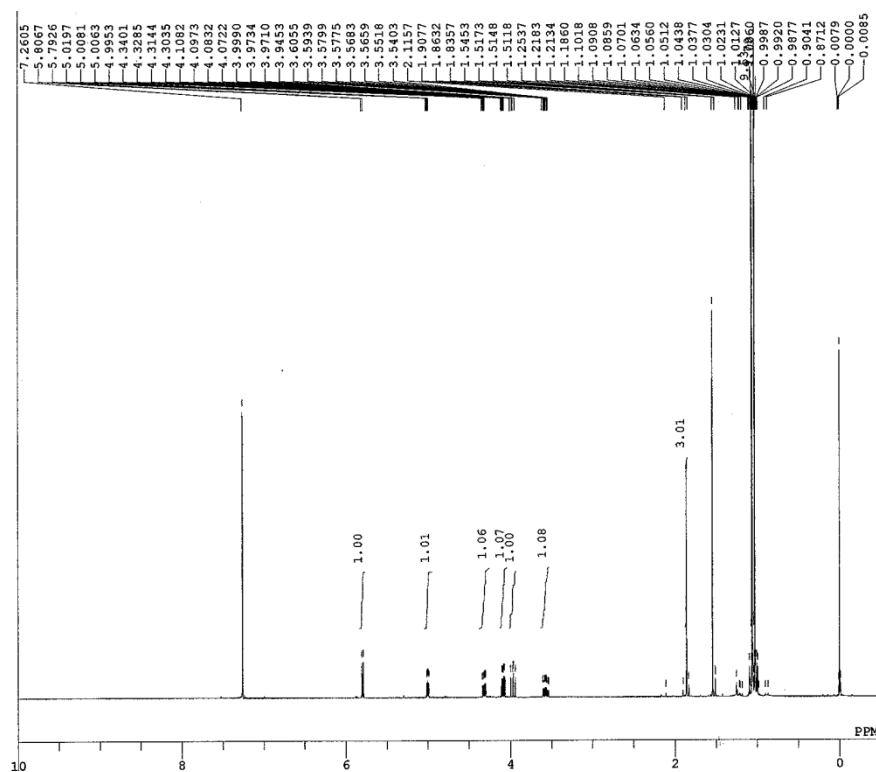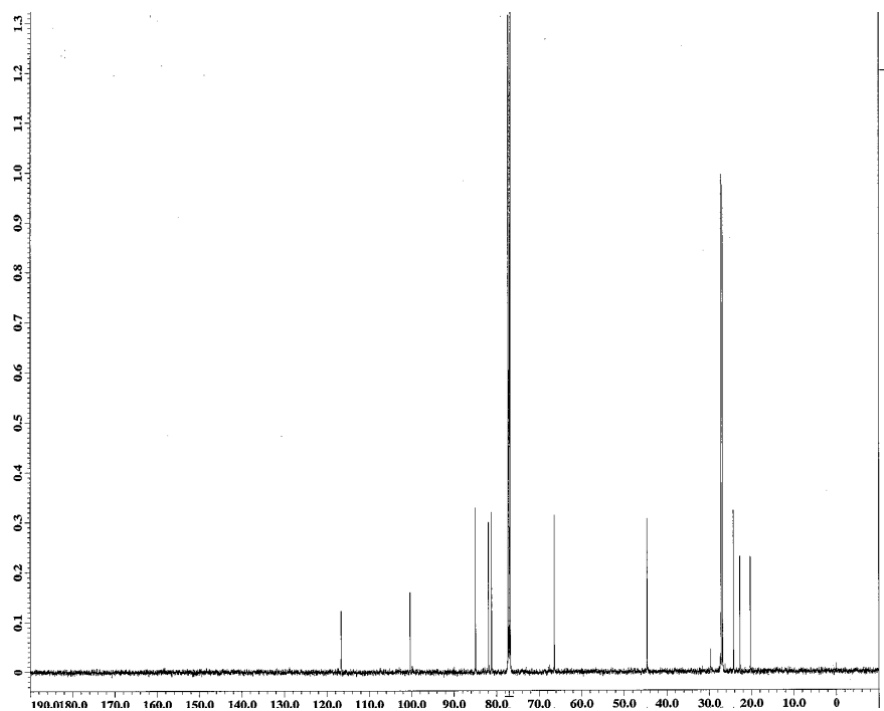

Fig. 15:  $^1\text{H}$  NMR and  $^{13}\text{C}$  NMR spectrum of compound **22b** in  $\text{CDCl}_3$

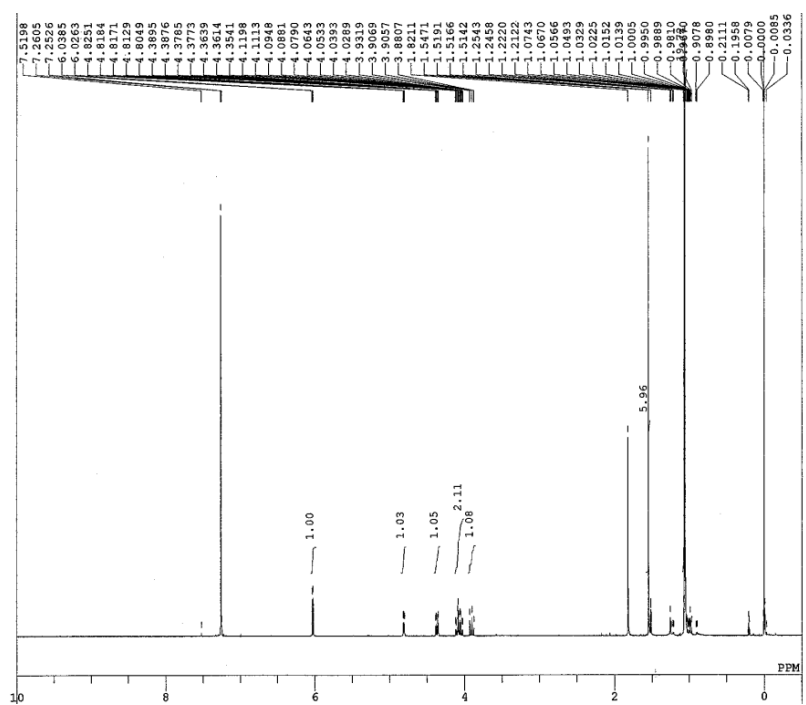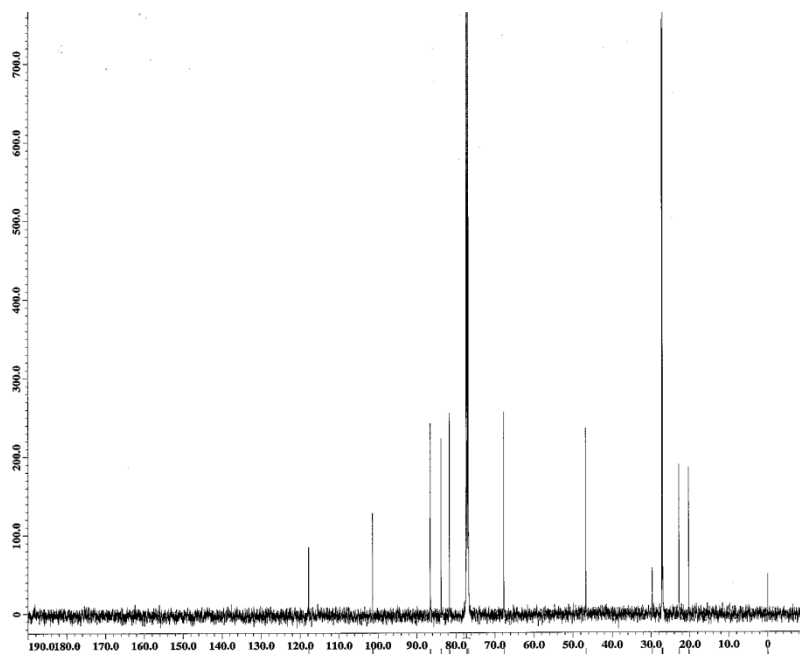

Fig. 16:  $^1\text{H}$  NMR and  $^{13}\text{C}$  NMR spectrum of compound **23** in  $\text{CDCl}_3$

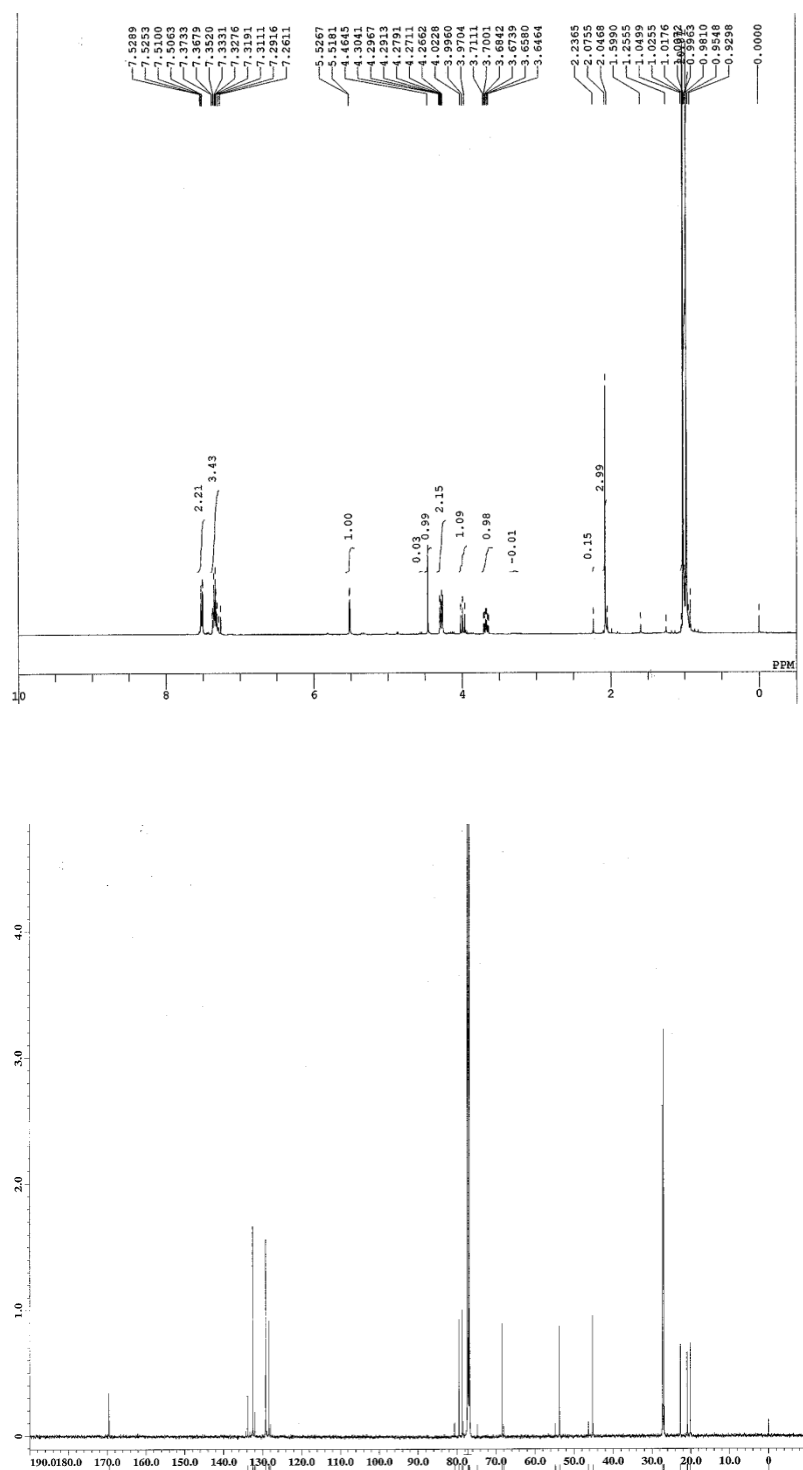

Fig. 17:  $^1\text{H}$  NMR and  $^{13}\text{C}$  NMR spectrum of compound **24** in  $\text{CDCl}_3$

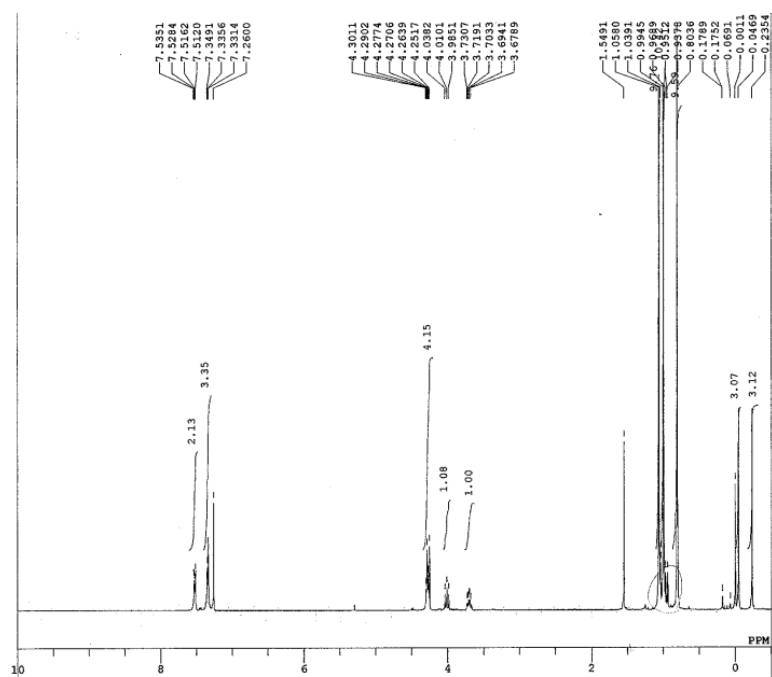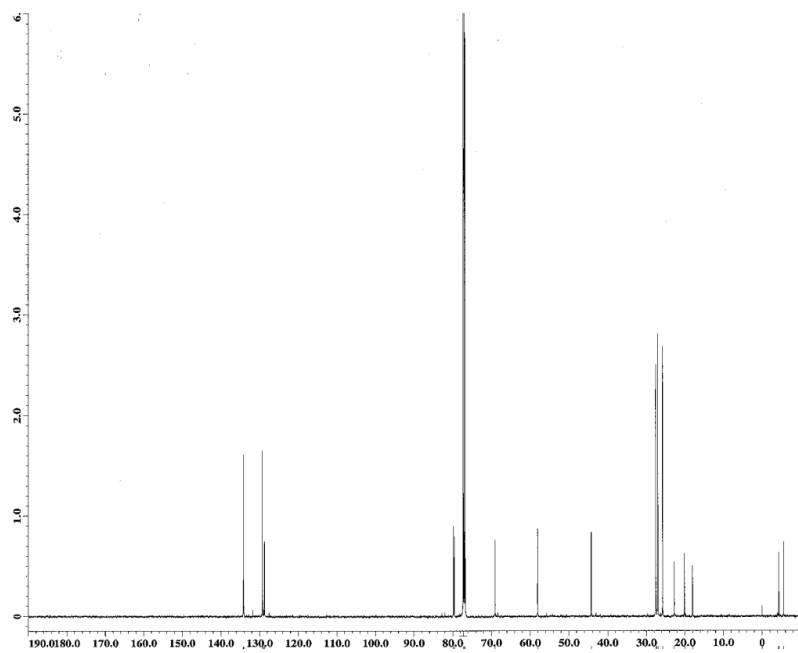

Fig. 18:  $^1\text{H}$  NMR and  $^{13}\text{C}$  NMR spectrum of compound **25** in  $\text{CDCl}_3$

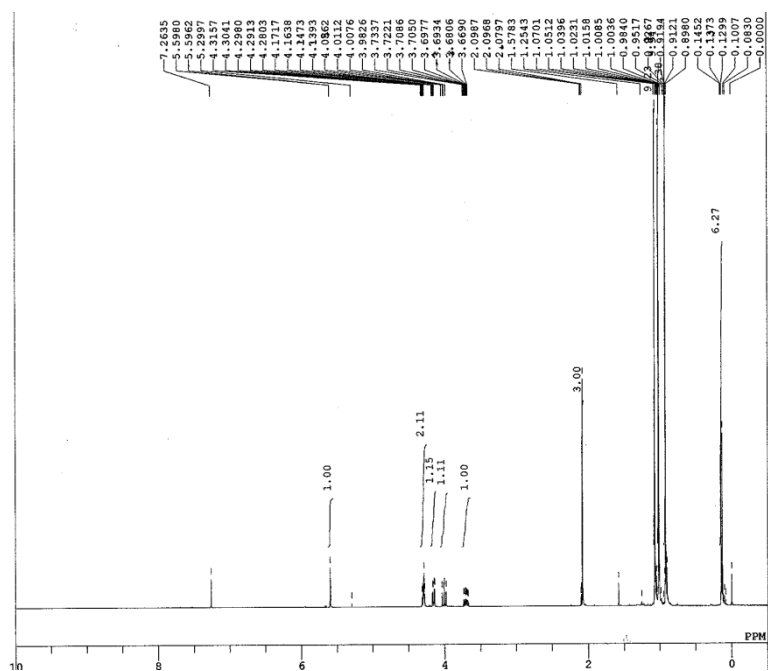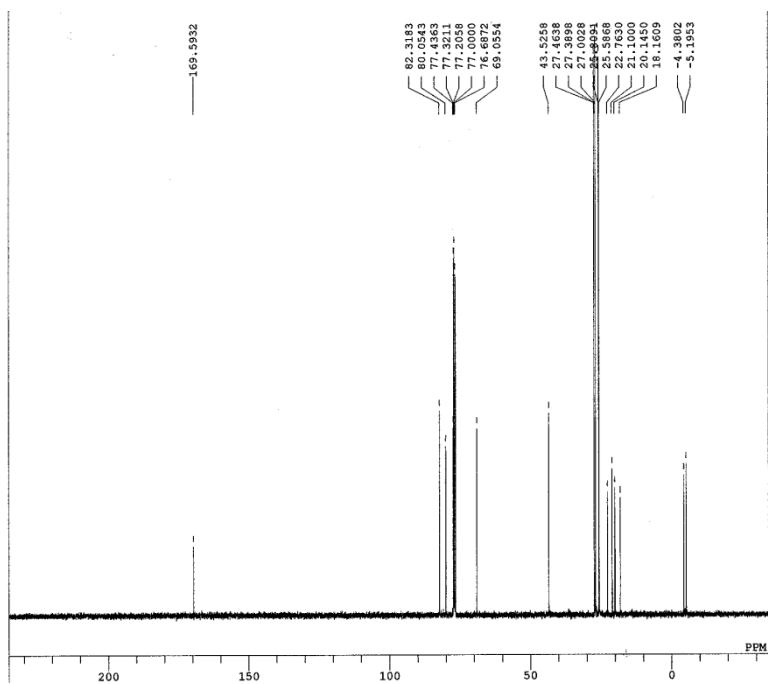



Fig. 19:  $^1\text{H}$  NMR and  $^{13}\text{C}$  NMR spectrum of compound **27** in  $\text{CDCl}_3$

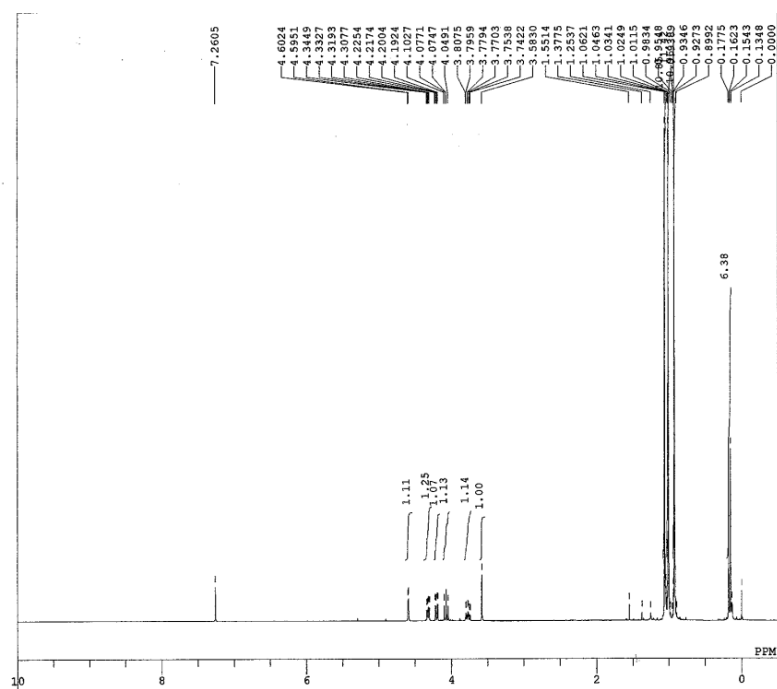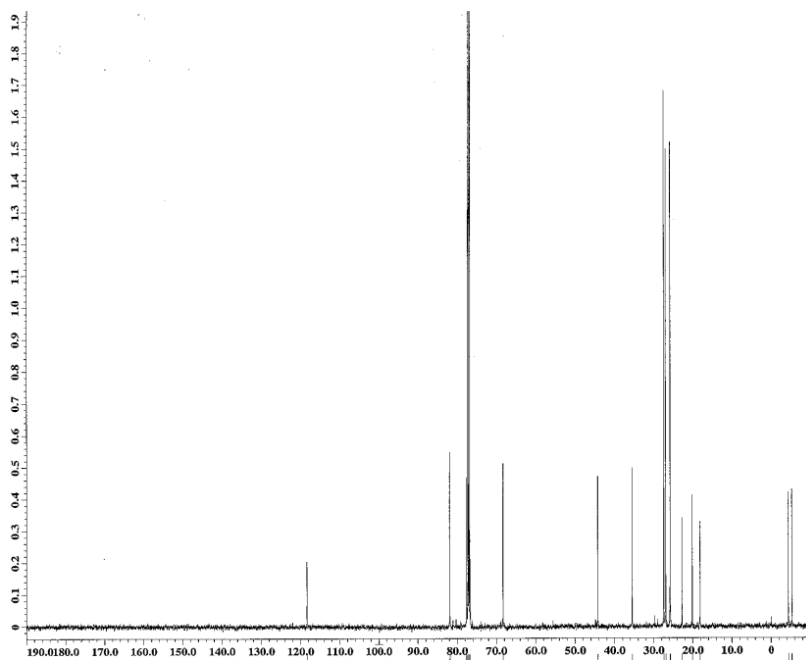

Fig. 20:  $^1\text{H}$  NMR and  $^{13}\text{C}$  NMR spectrum of compound **29** in  $\text{CDCl}_3$

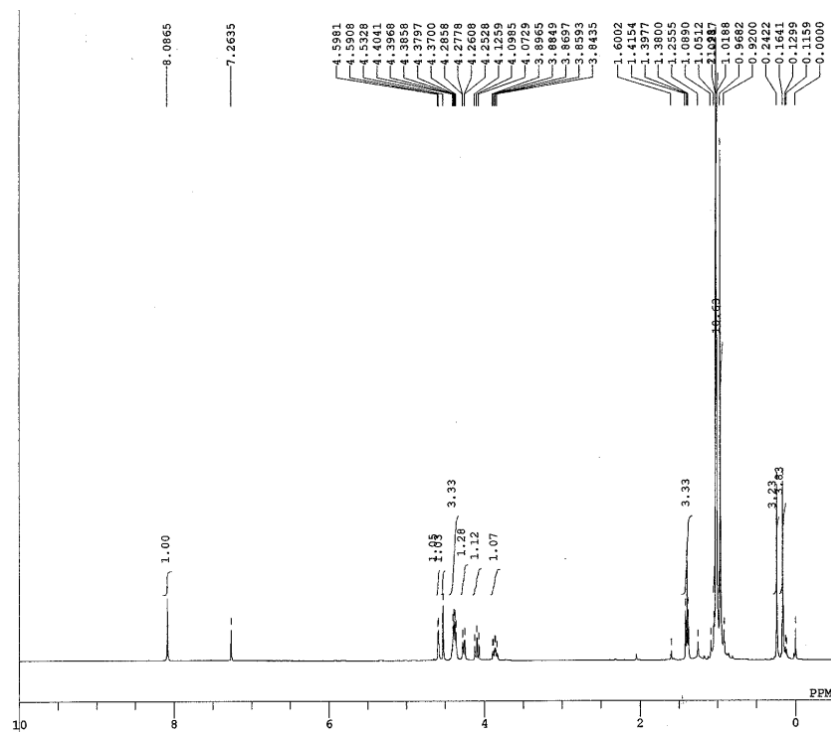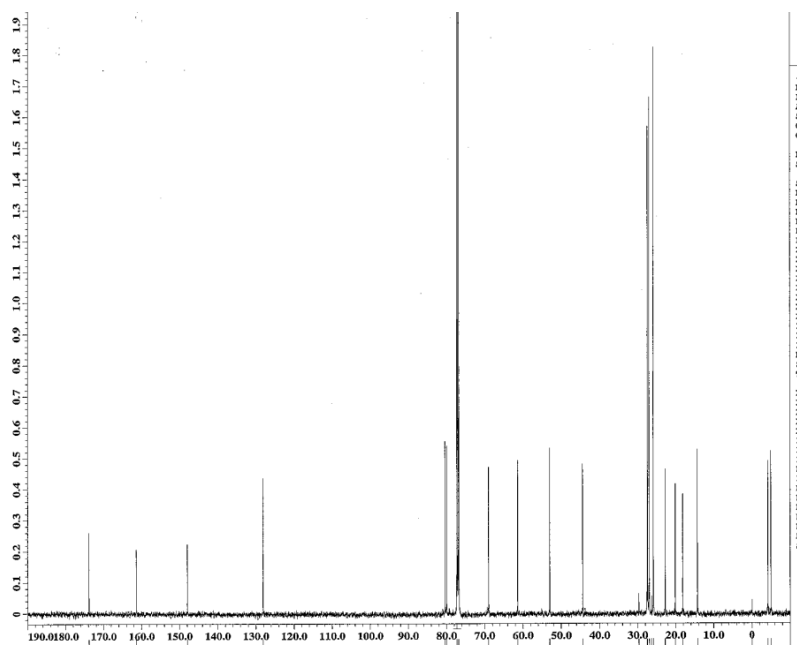

Fig. 21:  $^1\text{H}$  NMR and  $^{13}\text{C}$  NMR spectrum of compound **30** in  $\text{CDCl}_3$

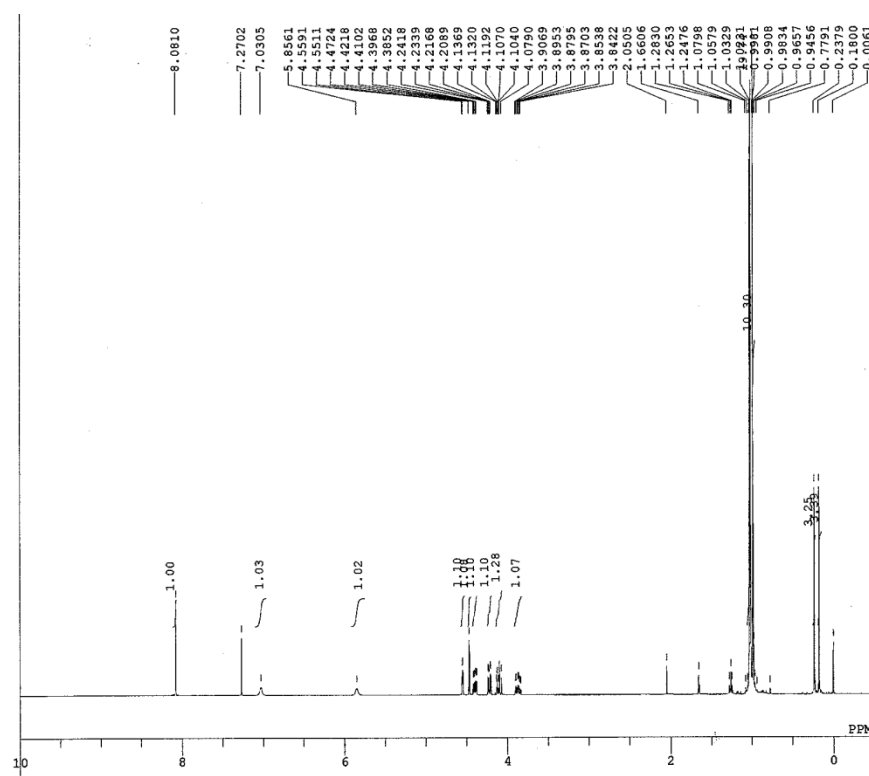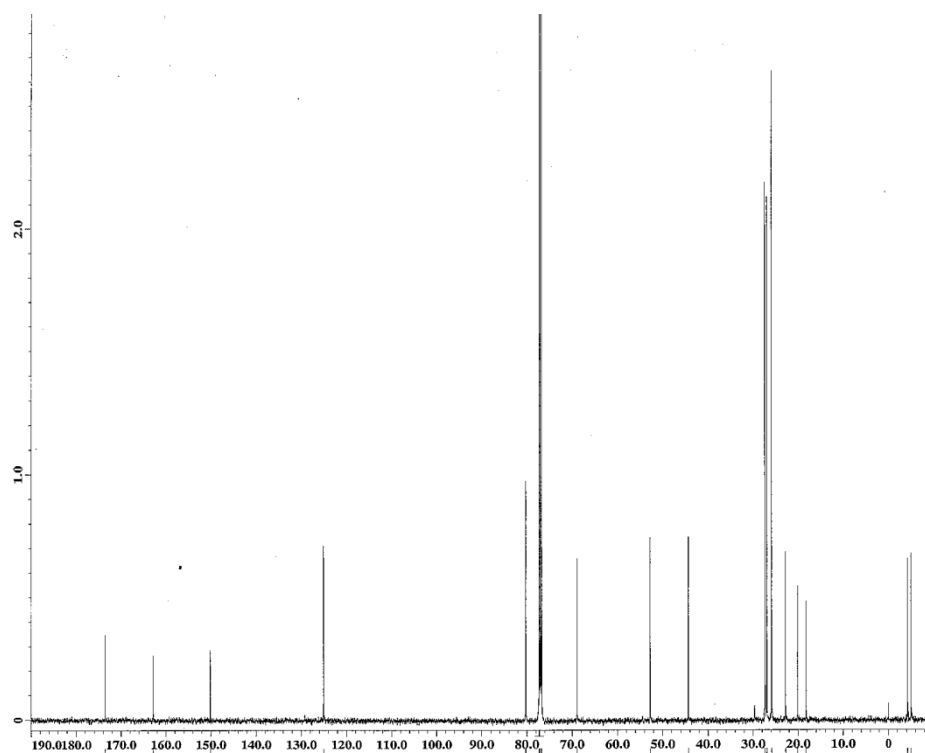

Fig. 22:  $^1\text{H}$  NMR and  $^{13}\text{C}$  NMR spectrum of compound **31** in  $\text{CD}_3\text{OD}$

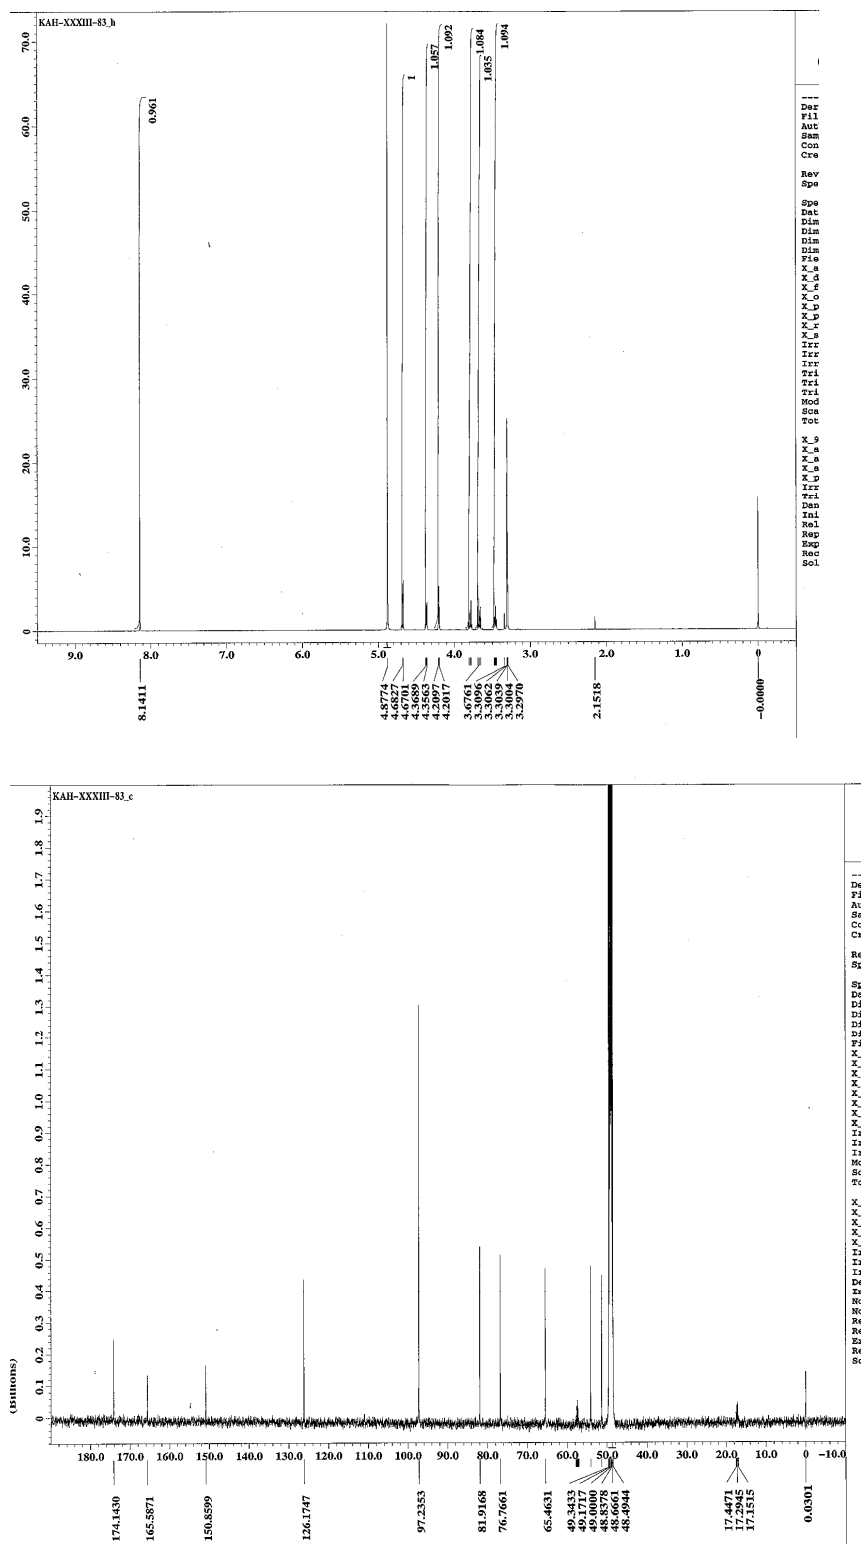

Supplement: Supplementary file 1 [file 4567768]
